# Supplementary material
Source: PubMed Central journal article supplement (PMC4371829)
Supplement: supp_tpc.114.129668_tpc129668_SupplementalRevised.pdf [file supp_tpc.114.129668_tpc129668_SupplementalRevised.pdf]

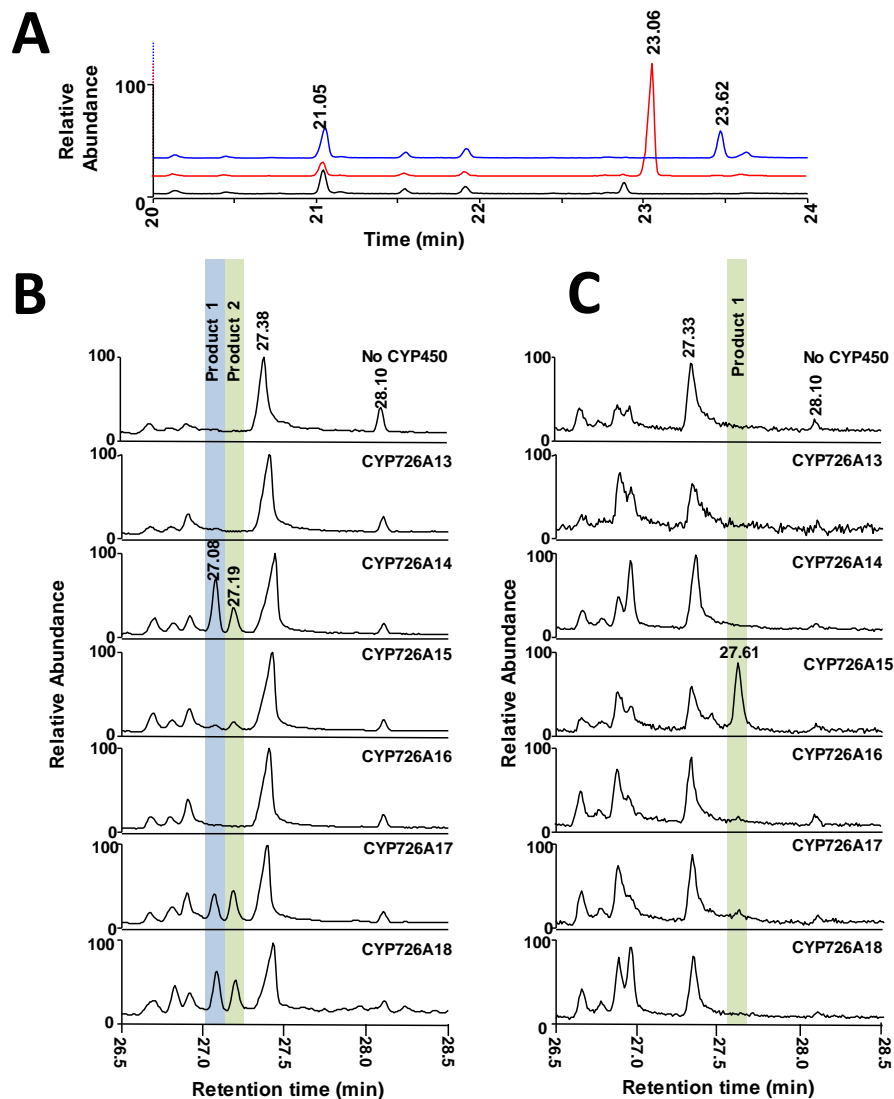

**Supplemental Figure 1.** A - GC analysis of a chloroform extract of *N. benthamiana* leaves infiltrated with a p19 vector only (black line) or the p19 vector plus a pFGC5951 vector containing a casbene synthase ORF from *J. curcas* (red line) or the neocembrene synthase ORF from *R. communis*. The elution times of casbene (23.06 min) and neocembrene (23.62) are indicated. B – GC analysis of a chloroform extract of *N. benthamiana* leaves infiltrated with a p19 vector, a pFGC vector containing a casbene synthase ORF for *J. curcas* and pFGC vectors contain the ORF for a cytochrome P450 gene as indicated in the top right of each graph. C - GC analysis of a chloroform extract of *N. benthamiana* leaves infiltrated with a p19 vector, a pFGC vector containing the neocembrene synthase ORF for *R. communis* and pFGC vectors contain the ORF for a cytochrome P450 gene as indicated in the top right of each graph.

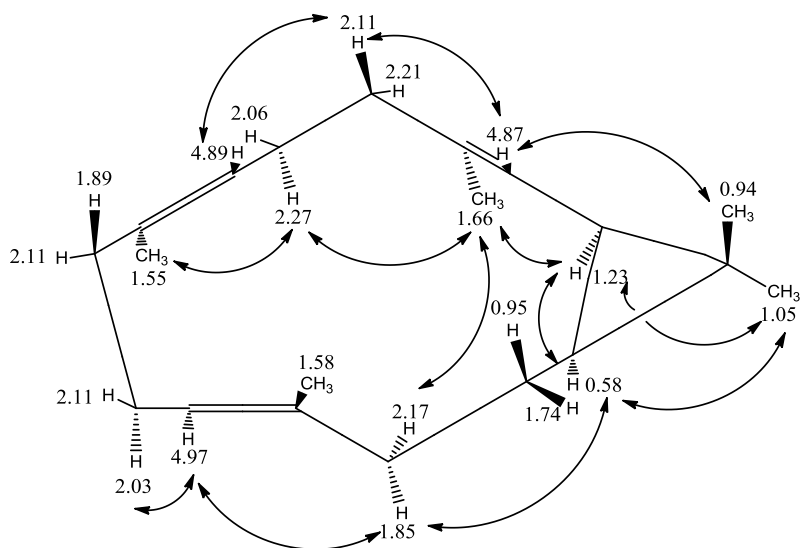

**Supplemental Figure 2.** Critical NOESY correlations observed for casbene, indicated by double-headed arrows between protons.

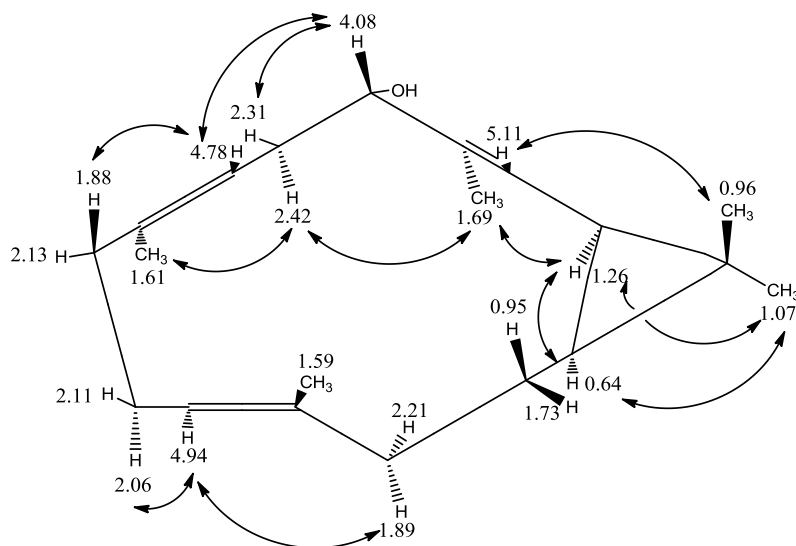

**Supplemental Figure 3.** Critical NOESY correlations used in establishing the relative configuration at the 5-position of 5 $\alpha$ -hydroxy-casbene, indicated by double-headed arrows between protons (the conformation adopted by the 14-membered ring is similar to that of casbene itself – see Supplemental Figure 2).

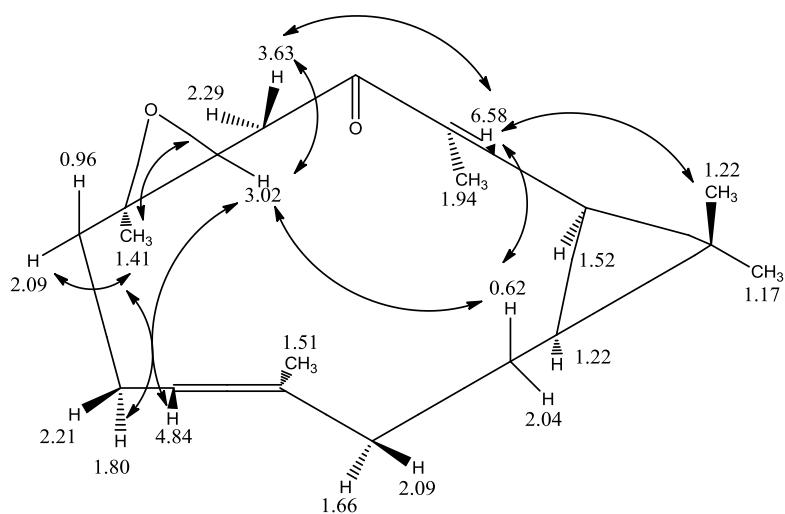

**Supplemental Figure 4.** Critical NOESY correlations observed for 5-keto-7,8-epoxy-casbene, indicated by double-headed arrows between protons.

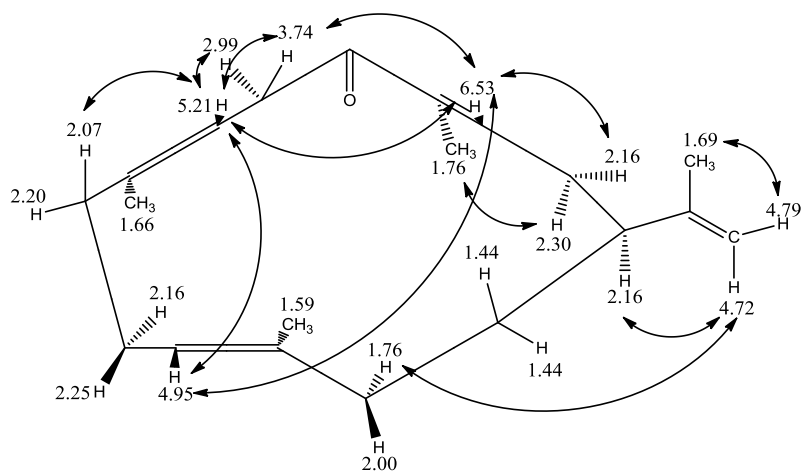

**Supplemental Figure 5.** Critical NOESY correlations observed for 5-keto-neocembrene, indicated by double-headed arrows between protons.

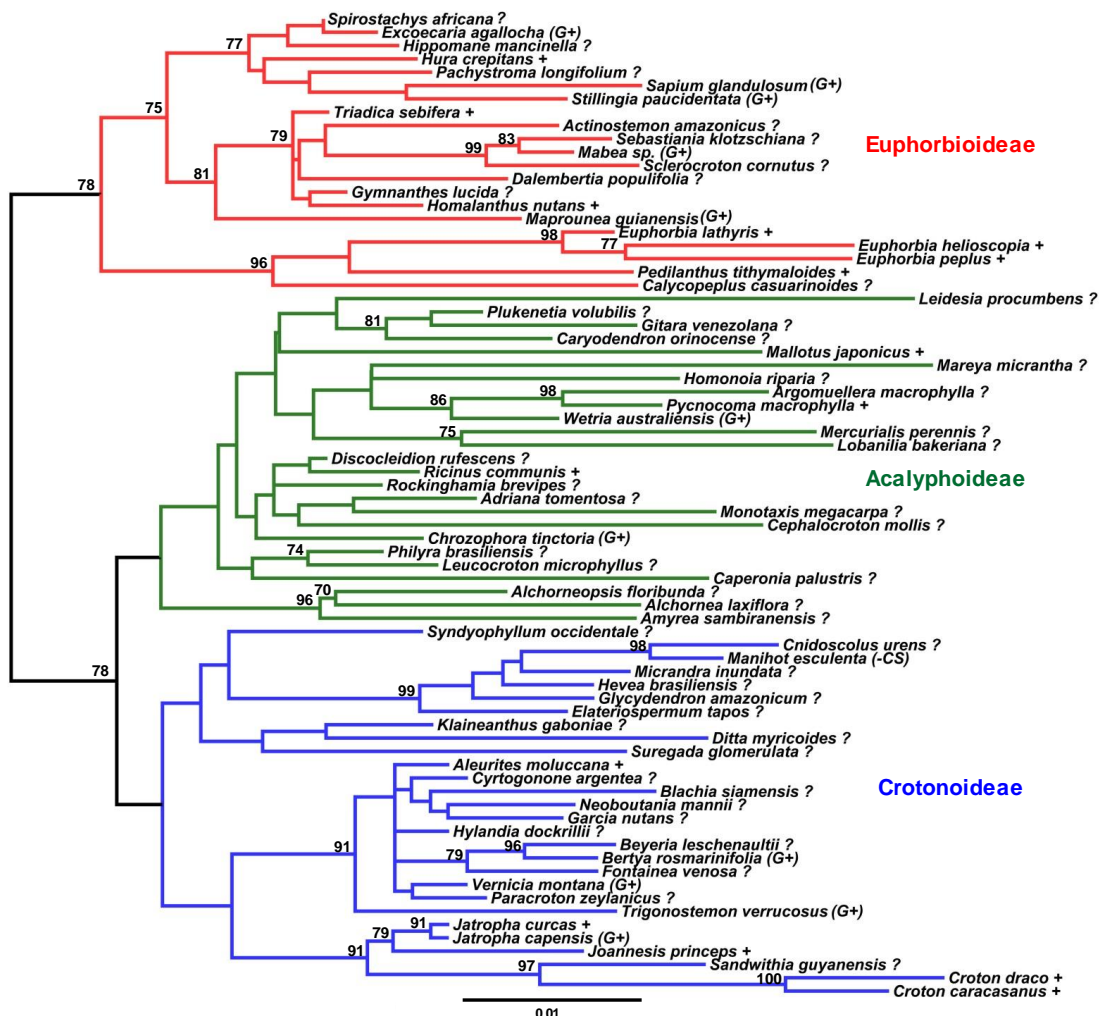

**Supplemental Figure 6.** Midpoint rooted phylogenetic tree of the Euphorbiaceae based on the plastidial ribulose-1,5-bisphosphate carboxylase/oxygenase large subunit (rbcl) DNA sequence. The taxa included are: ACALYPHOIDEAE subfamily highlighted in green; *Leidesia procumbens* [AY794932], *Plukenetia volubilis* [AY794929], *Gitara venezolana* [AY794924], *Caryodendron orinocense* [AY794931], *Mallotus japonicas* [AY794934], *Mareya micrantha* [AY794941], *Homonoia riparia* [AY794978], *Argomuelleria macrophylla* [AY794937], *Pycnocomma macrophylla* [AY794939], *Wetria australiensis* [AY794940], *Mercurialis perennis* [AY794944], *Lobanilia bakeriana* [AY794947], *Discocleidion rufescens* [AY794952], *Ricinus communis* [AY794915], *Rockinghamia brevipes* [AY794983], *Adriana tomentosa* [AY794917], *Monotaxis megacarpa* [AY947535], *Cephalocroton mollis* [AY794950], *Chrozophora tinctoria* [AY794951], *Philyra brasiliensis* [AY794920], *Leucocroton microphyllus* [AY794980], *Caperonia palustris* [AY794923], *Alchorneopsis floribunda* [AY794962], *Alchornea laxiflora* [AY794957] and *Amyrea sambiranensis* [AY794964]. EUPHORBIODEAE subfamily highlighted in red; *Spirostachys africana* [AY794838], *Excoecaria agallocha* [AY794839],

*Hippomane mancinella* [AY794835], *Hura crepitans* [AY788177], *Pachystroma longifolium* [AY794847], *Sapium glandulosum* [AY794841], *Stillingia paucidentata* [AY794845], *Triadica sebifera* [AY794859], *Actinostemon amazonicus* [AY794861], *Sebastiania klotzschiana* [AY794850], *Mabea* sp. [AY794852], *Sclerocroton cornutus* [AY794850], *Dalembertia populifolia* [AY794857], *Gymnanthes lucida* [AY794858], *Homalanthus nutans* [AB267957], *Maprounea guianensis* [AJ418810], *Euphorbia lathyris* [HM849989], *Euphorbia helioscopia* [HM849988], *Euphorbia peplus* (from transcriptome assembly), *Pedilanthus tithymaloides* [AY794825] and *Calycopeplus casuarinoides* [AY794829]. CROTONOIDEAE subfamily highlighted in blue; *Syndyophyllum occidentale* [AY794967], *Cnidoscopus urens* [AY794874], *Manihot esculenta* [AB233880], *Micrandra inundata* [AY794877], *Hevea brasiliensis* [HQ285842], *Glycydendron amazonicum* [AY794876], *Elateriospermum tapos* [AY794873], *Klaineanthus gabonae* [AY794869], *Ditta myricoides* [AY794871], *Suregada glomerulata* [AY794866], *Aleurites moluccana* [AY794883], *Cyrtogonone argentea* [AY794974], *Blachia siamensis* [AY794888], *Neoboutonia mannii* [AY794896], *Garcia nutans* [AY794890], *Hylandia dockrillii* [AY794882], *Beyeria leschenaultia* [AY794879], *Bertya rosmarinifolia* [AY794878], *Fontainea venosa* [AY794881], *Vernicia montana* [AY794899], *Paracroton zeylanicus* [AY794894], *Trigonostemon verrucosus* [AY788192], *Jatropha curcas* [HQ153096], *Jatropha capensis* [AM234978], *Joannesia princeps* [AJ418808], *Sandwithia guyanensis* [AY794904], *Croton draco* [EF405840] and *Croton caracasanus* [EF405834]. The majority of the sequences were obtained in a study by Wurdack *et al.* (Wurdack *et al.*, 2005). The + symbols after the taxon names indicates species known to produce diterpenoids with structural relationships to casbene or neocembrene, whereas a (G+) denotes a member of the same genus produces casbene or neocembrene derived diterpenoids (Sakata *et al.*, 1971; Seip *et al.*, 1983; Ghisalberti *et al.*, 1985; Beutler *et al.*, 1989; Yamamura *et al.*, 1989; Brooks *et al.*, 1990; Kashman *et al.*, 1994; Achenbach and Benirschke, 1997; Murillo *et al.*, 2001; Satyanarayana *et al.*, 2001; Mongkolvisut and Sutthivaiyakit, 2007; Busch *et al.*, 2008; Johnson *et al.*, 2008; Xie *et al.*, 2010; Yamaguchi *et al.*, 2012; Chavez *et al.*, 2013; Li *et al.*, 2013; Lu *et al.*, 2014)]. The ? symbol indicates no reported production of casbene or neocembrene derived diterpenoids whereas the (-CS) denotes genome does not contain a casbene/neocembrene synthase ortholog. The bootstrap values for 1,000 replicates are shown as percentages. Bootstrap values below 70% are not shown. The edited sequence alignment used for construction of this tree is available in Supplemental Dataset 2.

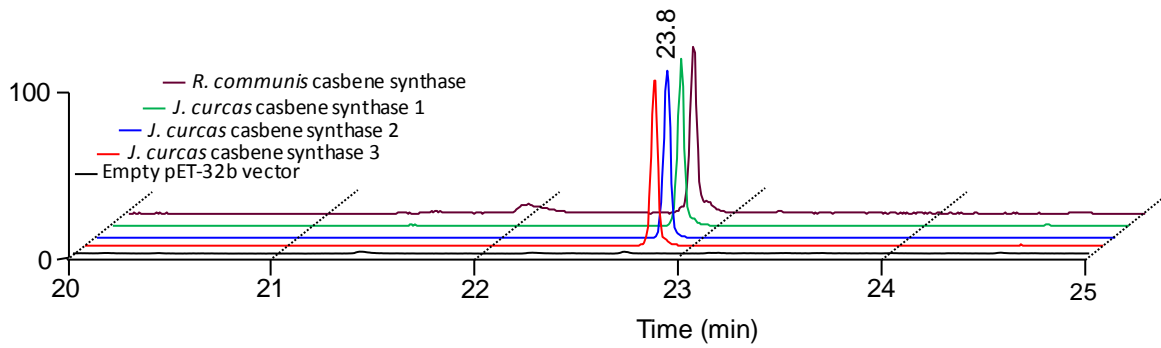

**Supplemental Figure 7.** Conversion of GGPP into casbene by a crude lysate obtained from the expression of thioredoxin fusion proteins of casbene synthase from *R. communis* and three casbene synthase homologs from *J. curcas*. Cleared lysates were incubated with GGPP and then extracted with hexane and analyzed by GC-MS. An extract from reaction using the cleared lysate of the empty pET32b vector was also analyzed as a negative control.



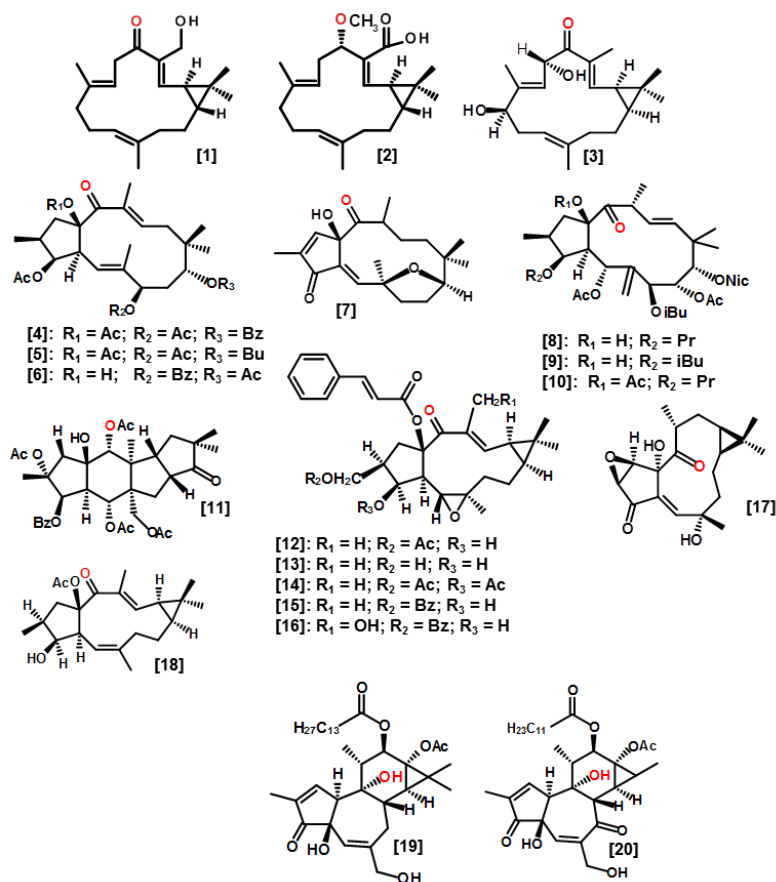

| No.                          | Compound                                                               | Source species               | Biological activity | Ref.                         |
|------------------------------|------------------------------------------------------------------------|------------------------------|---------------------|------------------------------|
| <b>Casbanes</b>              |                                                                        |                              |                     |                              |
| [1]                          | Pekinenin A                                                            | <i>Euphorbia pekinensis</i>  | Cytotoxic           | (Shao et al., 2011)          |
| [2]                          | Pekinenin B                                                            | <i>Euphorbia pekinensis</i>  | Cytotoxic           | (Shao et al., 2011)          |
| [3]                          | 1,4-dihydroxy-2 <i>E</i> ,6 <i>E</i> ,12 <i>E</i> -trien-5-one-casbane | <i>Croton nepetaefolius</i>  | Antibacterial       | (Sá et al., 2012)            |
| <b>Jatrophanes</b>           |                                                                        |                              |                     |                              |
| [4]-[6]                      | Pubescenes A-C                                                         | <i>Euphorbia pubescens</i>   | MDR reversal        | (Valente et al., 2004)       |
| [7]                          | Japodagrone                                                            | <i>Jatropha podogrica</i>    | Antibacterial       | (Aiyelaagbe et al., 2007)    |
| [8]-[10]                     | Euphodendrophanes A-C                                                  | <i>Euphorbia dendroides</i>  | MDR reversal        | (Aljančić et al., 2011)      |
| <b>Rearranged jatrophane</b> |                                                                        |                              |                     |                              |
| [11]                         | Portlandicine                                                          | <i>Euphorbia portlandica</i> | MDR reversal        | (Madureira et al., 2004)     |
| <b>Lathyranes</b>            |                                                                        |                              |                     |                              |
| [12]-[16]                    | Latilagascenes A-E                                                     | <i>Euphorbia lagascae</i>    | Cytotoxic           | (Pusztai et al., 2007)       |
| [17]                         | Japodagrins                                                            | <i>Jatropha podogrica</i>    | Antibacterial       | (Aiyelaagbe et al., 2007)    |
| [18]                         | Jolkinol D                                                             | <i>Euphorbia piscatoria</i>  | MDR reversal        | (Reis et al., 2013)          |
| <b>Tiglanes</b>              |                                                                        |                              |                     |                              |
| [19]                         | Phorbol-12-myristate-13-acetate                                        | <i>Croton tiglium</i>        | Co-carcinogenic     | (Van Duuren and Orris, 1965) |
| [20]                         | Trigowin A                                                             | <i>Trigonostemon howii</i>   | Antiviral           | (Bourjot et al., 2012)       |

**Supplemental Figure 8.** Structures of biologically active diterpenoids that have been isolated from a number of Euphorbiaceae. The oxygen atom labeled in red on each of the structures corresponds to the 5-position of casbene which was oxidized by castor enzymes CYP726A14, CYP726A17 and CYP726A18 (this study). The abbreviated functional groups are as follows; Ac = acetate, Bu = butyl, Bz = benzoyl, iBu = isobutyl, Nic = nicotinoyl and Pr = propanoyl.

**Supplemental Table 1: Primers used for qPCR analysis of *R. communis* genes**

| Transcript ID             | Gene Annotation             | Forward primer                   | Reverse primer                  | Amplicon size (bp) | Ta (°C) |
|---------------------------|-----------------------------|----------------------------------|---------------------------------|--------------------|---------|
| <b>Housekeeping genes</b> |                             |                                  |                                 |                    |         |
| Rc29836.m000559           | Actin 1                     | 5'-ACCGTATGAGCAAGGAGATCACTG-3'   | 5'-CCCTTGGAAATCCACATCTGCTG-3'   | 148                | 60      |
| Rc29983.m003140           | Nuclear cap-binding protein | 5'-AGCTGGGTCATTGGGCTCTTTC-3'     | 5'-GGAACCGCTTCCGATGGTAATCTC-3'  | 119                | 63      |
| Rc30169.m006323           | Ubiquitin 1                 | 5'-ATTCTCTCTGTCCAGCAAAGGC-3'     | 5'-CAAGCACAAAGATGAAGCACAGAAC-3' | 109                | 58      |
| <b>Target genes</b>       |                             |                                  |                                 |                    |         |
| Rc30169.m006273           | CYP726A13                   | 5'-CCAGTGCTCCTGCTGAGCTTCC-3'     | 5'-CCGGAGGTGAGTTGAAGCTGCC-3'    | 88                 | 60      |
| Rc30169.m006274           | Short-chain ADH             | 5'-CCAACAGGCTTGAAGGAAAGGTAG-3'   | 5'-TGTTTGCAAAGATTGTGGCCAAGC-3'  | 145                | 60      |
| Rc30169.m006275           | CYP726A14                   | 5'-AACACAGAGCCACCAGGAATCG-3'     | 5'-AGCTCCAAACATATCCAGAATGGC-3'  | 146                | 65      |
| Rc30169.m006276           | Neocembrene synthase        | 5'-ACATAATGTCTCATGTGAGCGAGCAA-3' | 5'-GTCGTGCAAGGTTGACCACTCT-3'    | 210                | 63      |
| Rc30169.m006277           | CYP726A15                   | 5'-GCTAGACCACCGCAACCGCA-3'       | 5'-AGGCGGTGATGGGGAAGAGC-3'      | 149                | 65      |
| Rc30169.m006279           | CYP726A16                   | 5'-TCCAAGAATGGTGGTGGTGACG-3'     | 5'-ACCGCCAAGCATTTCCAGAATGG-3'   | 146                | 65      |
| Rc30169.m006281           | BAHD acyltransferases       | 5'-ACGCATGTCGAGGTGGTGTC-3'       | 5'-CATGCGACGATGCAGTTGGC-3'      | 97                 | 65      |
| Rc30169.m006282           | CYP726A17                   | 5'-CGCTTGAGCTTGTGCTAAGACC-3'     | 5'-GCTCCCAGCACCAAACATTTCCAG-3'  | 144                | 65      |
| Rc30169.m006283           | Casbene synthase            | 5'-TGGTGGTTCCTCTCCTTGTGAAAC-3'   | 5'-TCCAAGCTAGTGGTGGGTAAGC-3'    | 113                | 63      |
| Rc30169.m006285           | CYP726A18                   | 5'-ACAGTGTGTTGCGGCAGGA-3'        | 5'-TCCTGCCGGCTTTGTGTCA-3'       | 162                | 65      |
| Rc30169.m006287           | Short-chain ADH             | 5'-TGAGATTGGAAGCTCGCTCTGC-3'     | 5'-ACGGCTAAATCCACAGCGTTCC-3'    | 111                | 65      |

**Supplemental Table 2: Primers used for cloning of *R. communis* genes**

| Gene ID & annotation                      | Primer name   | Purpose                | Sequence                                         |
|-------------------------------------------|---------------|------------------------|--------------------------------------------------|
| Rc30169.m006273<br>(CYP726A13)            | Rc6273F       | Cloning                | 5'-ATGGACAAGCAAATCCTATCATATCC-3'                 |
|                                           | Rc6275R       | Cloning                | 5'-TCAGTCCGTTGTTGGTGAAGGG-3'                     |
|                                           | Rc6273_AscI_F | Subcloning (pFGC-5941) | 5'-AAAAGGCGCGCCAAAAATGGACAAGCAAATCCTATC-3'       |
|                                           | Rc6273_PacI_R | Subcloning (pFGC-5941) | 5'-AAAATTAATTAATCAGTCCGTTGTTGGTGAAG-3'           |
| Rc30169.m006275<br>(CYP726A14)            | Rc6275F       | Cloning                | 5'-ATGGAGCAGCAATTGCTATCG-3'                      |
|                                           | Rc6275R       | Cloning                | 5'-CTATGGCAAAGTAGTGAATGGAATGG                    |
|                                           | Rc6275_AscI_F | Subcloning (pFGC-5941) | 5'-AAAAGGCGCGCCAAAAATGGAGCAGCAATTGCTATCG-3'      |
|                                           | Rc6275_PacI_R | Subcloning (pFGC-5941) | 5'-AAAATTAATTAATCATGGAAGTAGTGAATG-3'             |
|                                           | Rc6275_AgeI_F | Subcloning (pEAQ-HT)   | 5'-AAAACCGGTAAAAATGGAGCAGCAATTGCTATCG-3'         |
|                                           | Rc6275_XhoI_R | Subcloning (pEAQ-HT)   | 5'-AAAACCTCGAGCTATGGCAAAGTAGTGAATG-3'            |
| Rc30169.m006276<br>(Neocembrene synthase) | Rc6276F       | Cloning                | 5'-ATGGCACTGCAATCACTACTATTC-3'                   |
|                                           | Rc6276R       | Cloning                | 5'-TTACACATGTTTTGTTTTGGTTTTCTCC-3'               |
|                                           | Rc6276_AscI_F | Subcloning (pFGC-5941) | 5'-AAAAGGCGCGCCAAAAATGGCACTGCAATCACTACTATTC-3'   |
|                                           | Rc6276_PacI_R | Subcloning (pFGC-5941) | 5'-AAAATTAATTAATTACACATGTTTTGTTTTGGTTTTCTC-3'    |
|                                           | Rc6276_AgeI_F | Subcloning (pEAQ-HT)   | 5'-AAAACCGGTAAAAATGGCACTGCAATCACTACTATTC-3'      |
|                                           | Rc6276_XhoI_R | Subcloning (pEAQ-HT)   | 5'-AAAACCTCGAGTTACACATGTTTTGTTTTGGTTTTCTC-3'     |
| Rc30169.m006277<br>(CYP726A15)            | Rc6277F       | Cloning                | 5'-ATGTCATTGCAACCTGCACCTG-3'                     |
|                                           | Rc6277R       | Cloning                | 5'-TTAAGGATGAAATAGAACAGGAATC-3'                  |
|                                           | Rc6277_AscI_F | Subcloning (pFGC-5941) | 5'-AAAAGGCGCGCCAAAAATGTCATTGCAACCTGCACCTG-3'     |
|                                           | Rc6277_PacI_R | Subcloning (pFGC-5941) | 5'-AAAATTAATTAAGGATGAAATAGAACAGGAATC-3'          |
|                                           | Rc6277_AgeI_F | Subcloning (pEAQ-HT)   | 5'-AAAACCGGTAAAAATGTCATTGCAACCTGCACCTG-3'        |
|                                           | Rc6277_XhoI_R | Subcloning (pEAQ-HT)   | 5'-AAAACCTCGAGTTAAGGATGAAATAGAACAGGAATC-3'       |
| Rc30169.m006279<br>(CYP726A16)            | Rc6279F       | Cloning                | 5'-ATGGAAAGTGCTGCTCACCAATC-3'                    |
|                                           | Rc6279R       | Cloning                | 5'-TTATGGTAAAGGACTGACGGGAATGG-3'                 |
|                                           | Rc6279_AscI_F | Subcloning (pFGC-5941) | 5'-AAAAGGCGCGCCAAAAATGGAAAGTGCTGCTCACCAATC-3'    |
|                                           | Rc6279_PacI_R | Subcloning (pFGC-5941) | 5'-AAAATTAATTAATTATGGTAAAGGACTGACG-3'            |
|                                           | Rc6279_AgeI_F | Subcloning (pEAQ-HT)   | 5'-AAAACCGGTAAAAATGGAAAGTGCTGCTCACCAATC-3'       |
|                                           | Rc6279_XhoI_R | Subcloning (pEAQ-HT)   | 5'-AAAACCTCGAGTTATGGTAAAGGACTGACGGGAATG-3'       |
| Rc30169.m006282<br>(CYP726A17)            | Rc6282F       | Cloning                | 5'-ATGGAGAAACAAATCCTATCATTTCAG-3'                |
|                                           | Rc6282R       | Cloning                | 5'-CTAAGGAGTAAATGGAATGGGAATC-3'                  |
|                                           | Rc6282_AscI_F | Subcloning (pFGC-5941) | 5'-AAAAGGCGCGCCAAAAATGGAGAAACAAATCCTATCATTTC-3'  |
|                                           | Rc6282_PacI_R | Subcloning (pFGC-5941) | 5'-AAAATTAATTAACCTAAGGAGTAAATGGAATG-3'           |
| Rc30169.m006283<br>(Casbene synthase)     | Rc6282F       | Cloning                | 5'-ATGGCATTGCCATCAGCTG-3'                        |
|                                           | Rc6282R       | Cloning                | 5'-TCAAATAGAAATTGGATCAACGGAC-3'                  |
|                                           | Rc6282_NcoI_F | Subcloning (pET32b)    | 5'-AGCCATGGCCTCCTCAACAACCCACCAAGAA-3'            |
|                                           | Rc6282_NotI_R | Subcloning (pET32b)    | 5'-AAGCGGCCGCTCAAATAGAAATTGGATCAACG-3'           |
| Rc30169.m006285<br>(CYP726A18)            | Rc6285F       | Cloning                | 5'-ATGTCATCACAAACCAGCAGTTTTAC-3'                 |
|                                           | Rc6285R       | Cloning                | 5'-TCAATGTGTAGGATATAGAACAGG-3'                   |
|                                           | Rc6285_AscI_F | Subcloning (pFGC-5941) | 5'-AAAAGGCGCGCCAAAAATGTCATCACAAACCAGCAGTTTTAC-3' |
|                                           | Rc6285_PacI_R | Subcloning (pFGC-5941) | 5'-AAAATTAATTAATCAATGTGTAGGATATAGAAC-3'          |
|                                           | Rc6285_AgeI_F | Subcloning (pEAQ-HT)   | 5'-AAAACCGGTAAAAATGTCATCACAAACCAGCAGTTTTAC-3'    |
|                                           | Rc6285_XhoI_R | Subcloning (pEAQ-HT)   | 5'-AAAACCTCGAGTCAATGTGTAGGATATAGAACAGG-3'        |

**Supplemental Table 3: Primers used for cloning and subcloning of *J. curcas* genes**

| Gene ID/<br>function | Primer name   | Purpose                 | Sequence                                    |
|----------------------|---------------|-------------------------|---------------------------------------------|
| Casbene<br>synthase  | CAS10         | Degenerate PCR, forward | 5'-CTYGAGTTTTCGAAGYTGGA-3'                  |
|                      | CAS21         | Degenerate PCR, forward | 5'-ATTCCWTATGCAAGAGAYAGAATG-3'              |
|                      | CAS9          | Degenerate PCR, reverse | 5'-ACTARTTCTTGAWGCGCTTC-3'                  |
| JcCAS1               | JcCAS1_F      | Cloning                 | 5'-TTCATATTTGTTGCTAATCCTC-3'                |
|                      | JcCAS1_R      | Cloning                 | 5'-CAAGGTACAGGATTTATGCAAATCC-3'             |
|                      | JcCAS1_NcoI_F | Subcloning (pET32b)     | 5'-AGCCATGGCATCAACAAAATCTGAGACAGAAG-3'      |
|                      | JcCAS1_NotI_R | Subcloning (pET32b)     | 5'-AAGCGGCCGCTCAAGTGGCAATAGGTTCAATG-3'      |
|                      | JcCAS1_AscI_F | Subcloning (pFGC-5941)  | 5'-AAAAGGCGCGCCAAAATGGCAATGCAACCTGCAATTG-3' |
|                      | JcCAS1_PacI_R | Subcloning (pFGC-5941)  | 5'-AAAATTAATTATCAAGTGGCAATAGGTTCAATGAAC-3'  |
|                      | JcCAS1_AgeI_F | Subcloning (pEAQ-HT)    | 5'-AAAACCGGTAAAATGGCAATGCAACCTGCAATTG-3'    |
|                      | JcCAS1_XhoI_R | Subcloning (pEAQ-HT)    | 5'-AAAACCTCGAGTCAAGTGGCAATAGGTTCAATGAAC-3'  |
| JcCAS2               | JcCAS2_F      | Cloning                 | 5'-CCTCTTTAGTTCTCAAAGATG-3'                 |
|                      | JcCAS2_R      | Cloning                 | 5'-CCTCCAACCACAAAACAAATAGG-3'               |
|                      | JcCAS2_NcoI_F | Subcloning (pET32b)     | 5'-AGCCATGGCCTTATCAACAAAATCTGAGAC-3         |
|                      | JcCAS2_NotI_R | Subcloning (pET32b)     | 5'-AAGCGGCCGCTCAAATGGCAATAGGTTCAATG-3       |
| JcCAS3               | JcCAS3_F      | Cloning                 | 5'-CTTACATTCTACACTTTCCAA-3'                 |
|                      | JcCAS3_R      | Cloning                 | 5'-CGTTAATTTCTTTAAATTGCAAGG-3'              |
|                      | JcCAS3_NcoI_F | Subcloning (pET32b)     | 5'-AGCCATGGCCTTGTCACCAAAACCTAGTG-3          |
|                      | JcCAS3_NotI_R | Subcloning (pET32b)     | 5'-AAGCGGCCGCTCAAATTGGAATAGGTTCAA-3         |
| CYP726A20            | CYP726A20_F   | Cloning                 | 5'-ATGGAACACCAAATCCTCTCATTTCC-3'            |
|                      | CYP726A20_R   | Cloning                 | 5'-TTAGGGACGGAATGGAATGGGGA-3'               |
| CYP726A21            | CYP726A21_F   | Cloning                 | 5'-ATGGAACAACAATCCTCTCTTTTC-3'              |
|                      | CYP726A21_R   | Cloning                 | 5'-TTAAGGACGGAATGGTGGGGAATCA-3'             |
| CYP726A22            | CYP726A22_F   | Cloning                 | 5'-ATGGAACAGCAAATCCTCTCAGTTTC-3'            |
|                      | CYP726A22_R   | Cloning                 | 5'-TTAAGGATGGTATGGAATGGGAATCAGTTC-3'        |
| CYP726A23            | CYP726A23_F   | Cloning                 | 5'-ATGGAACATCAAATCCTCTCATTTCCAGC-3'         |
|                      | CYP726A23_R   | Cloning                 | 5'-GTACGGAATGGAATAGGAATGAGTTC-3'            |
| CYP726A24            | CYP726A24_F   | Cloning                 | 5'-ATGCTCTCATTTCCAGTTATTTTCAGTTTCC-3'       |
|                      | CYP726A24_R   | Cloning                 | 5'-TTAAGGACGGAATGCAACAGGGATCAGT-3'          |
| CYP726A25            | CYP726A25_F   | Cloning                 | 5'-ATGGACCACCGAATTCTCTCATTTCC-3'            |
|                      | CYP726A25_R   | Cloning                 | 5'-CTATGGGATTGGAATCAAATTGAGATC-3'           |
| CYP726A26            | CYP726A26_F   | Cloning                 | 5'-ATGGAGTATCAAATCCTCTCATCTC-3'             |
|                      | CYP726A26_R   | Cloning                 | 5'-CTAAGGATTAACCGGGTCGGAA-3'                |

**Supplemental Table 4: Primers used for cloning and subcloning of *E. pepplus* genes**

| Gene ID/<br>function | Primer name      | Purpose              | Sequence                                     |
|----------------------|------------------|----------------------|----------------------------------------------|
| CYP726A3             | CYP726A3_F       | Cloning              | 5'-ACTCAGTAATAGTTATCAGAAAAATGG-3'            |
|                      | CYP726A3_R       | Cloning              | 5'-CTAAATAATAGAAAACCTATTGACAAGGC-3'          |
| CYP726A4             | CYP726A4_F       | Cloning              | 5'-ATGGAGCTTCAATTTCAAATCCC-3'                |
|                      | CYP726A4_R       | Cloning              | 5'-CACTTACAGCAGCAACTAATTAACT-3'              |
| CYP726A5             | CYP726A5_F       | Cloning              | 5'-AAAATATATATGCAAGTATGGAGTTCAC-3'           |
|                      | CYP726A5_R       | Cloning              | 5'-TATGCACTAGATAGATTGGTTCAAAT-3'             |
| CYP726A6             | CYP726A6_F       | Cloning              | 5'-CACAGAAAAATGAAAATGCTTGAG-3'               |
|                      | CYP726A6_R       | Cloning              | 5'-CTACATGAATAAGTACCATTTATTCTCC-3'           |
| CYP726A19            | CYP726A19_F      | Cloning              | 5'-CACTTTCACGGAACCTCTCCAA-3'                 |
|                      | CYP726A19_R      | Cloning              | 5'-ACAGTCTCAAAAAATCAGTTTGCAG-3'              |
|                      | CYP726A19_AgeI_F | Subcloning (pEAQ-HT) | 5'-AAAACCGGTAAAAATGGCAACACTTCAACATTCAATGC-3' |
|                      | CYP726A19_XhoI_R | Subcloning (pEAQ-HT) | 5'-AAAACCTCGAGTCAGTTTGCAGGTGAAGTATGGAATGG-3' |
| Casbene<br>synthase  | EpCAS_INV        | Long distance PCR    | 5'-GACGAGGCTTTCGATTCTCGAAGG-3'               |
| CYP726A19            | CYP726A19_INV    | Long distance PCR    | 5'-GAATGACTCTGCCTAAGCGCTC-3'                 |

**Supplemental Table 5: Primers used for linkage mapping in *J. curcas***

| Marker                                                          | GenBank  | <i>J. curcas</i> genome build 4.5 | Forward primer(s)                                                          | Reverse primer                     |
|-----------------------------------------------------------------|----------|-----------------------------------|----------------------------------------------------------------------------|------------------------------------|
| <i>Simple Sequence Repeat (SSR) markers</i>                     |          |                                   |                                                                            |                                    |
| CYP726A20                                                       | KF986815 | Jcr4S15541 & Jcr4S12007*          | 5'-[M13†]-GCTTTCTCCGTCGCAAACGTGG-3'                                        | 5'-AGTGGTTTAAAGATCTTACATGGCGAA-3'  |
| CYP726 (partial)                                                | N/A      | Jcr4S16860.10                     | 5'-[M13]-ACGTTTGAAGAAGCGCAGTCA-3'                                          | 5'-TGCTATCCCTAGCTAACACTCCCT-3'     |
| BAC JHL23C09                                                    | AP011970 | N/A                               | 5'-[M13]-GCGGATTTGAATTTATTGTTTGGC-3'                                       | 5'-GGGATAGTCCATTGAGGCTTAGTTAGAA-3' |
| <i>Single Nucleotide Polymorphism (SNP) marker – KASP assay</i> |          |                                   |                                                                            |                                    |
| 3 x casbene synthase                                            | KJ026361 | N/A                               | 5'-[FAM‡]-TGAGCAACTCATCGTGCGGTCT-3'<br>5'-[VIC§]-TGAGCAACTCATCGTGCGGTCC-3' | 5'-CGGTCGTCGTCGCGCTTGTA-3'         |

**Supplemental Table 5 footnotes:**

\*Pseudomolecules Jcr4S15541 & Jcr4S12007 assembled were assembled into a single contig using CAP3. The presence of a single CYP726A gene within this contig was confirmed by cloning and sequencing of the corresponding cDNA sequence.

†The sequence of the M13 tail incorporated to permit labeling of PCR products as detailed in King *et al.* (2013) was 5'-TGTA AACGACGGCCAGT-3'.

‡The sequence of the FAM tail added for the KASP assay was 5'-GAAGGTGACCAAGTTCATGCT-3'

§The sequence of the VIC tail added for the KASP assay was 5'-GAAGGTCGGAGTCAACGGATT-3'

## Supplemental Table 6: NMR analysis of casbene

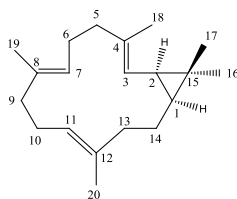

| Position† | $\delta_C$<br>(ppm) | Multiplicity in<br>edited-HSQC | $\delta_H$<br>(ppm) | Multiplicity in $^1H$ NMR   | Correlations from $^{13}C$ to $^1H$ observed in HMBC<br>(via $^2J_{CH}$ or $^3J_{CH}$ )                                      | Correlations from $^1H$ to $^1H$ observed in COSY<br>(principally $^3J_{HH}$ ) |
|-----------|---------------------|--------------------------------|---------------------|-----------------------------|------------------------------------------------------------------------------------------------------------------------------|--------------------------------------------------------------------------------|
| 1         | 30.6                | CH                             | 0.58                | ddd, $J = 9, 9, 2$ Hz       | 2.17 (H-13 $\beta$ ), 1.85 (H-13 $\alpha$ ), 1.74 (H-14 $\alpha$ ), 1.23 (H-2), 1.05 (H-16), 0.94 (H-17)                     | 1.74 (H-14 $\alpha$ ), 1.23 (H-2), 0.95 (H-14 $\beta$ )                        |
| 2         | 25.7                | CH                             | 1.23                | dd, $J = 9, 9$ Hz           | 1.74 (H-14 $\alpha$ ), 1.05 (H-16), 0.95 (H-14 $\beta$ ), 0.94 (H-17)                                                        | 4.87 (H-3), 0.58 (H-1)                                                         |
| 3         | 121.2               | CH                             | 4.87                | d, $J = 9$ Hz               | 2.21 (H-5 $\alpha$ ), 1.66 (H-18)                                                                                            | 1.66 (H-18), 1.23 (H-2)                                                        |
| 4         | 136.1               | C                              | -                   | -                           | 2.27 (H-6 $\alpha$ ), 2.11 (H-5 $\beta$ ), 1.66 (H-18), 1.23 (H-2)                                                           | -                                                                              |
| 5         | 39.3                | CH <sub>2</sub>                | 2.21                | dd, $J = 14, 5$ Hz          | 4.87 (H-3), 2.27 (H-6 $\alpha$ ), 1.66 (H-18)                                                                                | 2.27 (H-6 $\alpha$ ), 2.11 (H-5 $\beta$ )                                      |
| 6         | 25.0                | CH <sub>2</sub>                | 2.11                | m                           | 4.89 (H-7), 2.21 (H-5 $\alpha$ )                                                                                             | 2.27 (H-6 $\alpha$ ), 2.21 (H-5 $\alpha$ )                                     |
| 7         | 125.6               | CH                             | 2.27                | ddd, $J = 14, 10, 6, 4$ Hz  | 4.89 (H-7), 2.21 (H-5 $\alpha$ )                                                                                             | 4.89 (H-7), 2.21 (H-5 $\alpha$ ), 2.11 (H-5 $\beta$ ), 2.06 (H-6 $\beta$ )     |
| 8         | 133.3               | C                              | 2.06                | m                           | 2.27 (H-6 $\alpha$ ), 1.89 (H-9 $\beta$ ), 1.55 (H-19)                                                                       | 4.89 (H-7), 2.27 (H-6 $\alpha$ )                                               |
| 9         | 39.5                | CH <sub>2</sub>                | 4.89                | dd, $J = 6, 6$ Hz           | 2.27 (H-6 $\alpha$ ), 2.11 (H-9 $\alpha/10\beta$ ), 1.89 (H-9 $\beta$ ), 1.55 (H-19)                                         | 2.27 (H-6 $\alpha$ ), 2.06 (H-6 $\beta$ ), 1.55 (H-19)                         |
| 10        | 24.0                | CH <sub>2</sub>                | -                   | -                           | 4.89 (H-7), 2.11 (H-10 $\beta$ ), 2.03 (H-10 $\alpha$ ), 1.55 (H-19)                                                         | 1.89 (H-9 $\beta$ )                                                            |
| 11        | 123.4               | CH                             | 1.89                | dd, $J = 12, 12$ Hz         | 1.89 (H-9 $\beta$ )                                                                                                          | 2.11 (H-9 $\alpha/10\beta$ ), 2.03 (H-10 $\alpha$ )                            |
| 12        | 135.5               | C                              | 2.11                | M                           | 1.89 (H-9 $\beta$ )                                                                                                          | 4.97 (H-11), 2.11 (H-10 $\beta$ ), 1.89 (H-9 $\beta$ )                         |
| 13        | 40.4                | CH <sub>2</sub>                | 2.03                | M                           | 2.17 (H-13 $\beta$ ), 2.03 (H-10 $\alpha$ ), 1.85 (H-13 $\alpha$ ), 1.58 (H-20)                                              | 4.97 (H-11), 2.03 (H-10 $\alpha$ )                                             |
| 14        | 23.9                | CH <sub>2</sub>                | 4.97                | dd, $J = 6, 6$ Hz           | 2.17 (H-13 $\beta$ ), 2.03 (H-10 $\alpha$ ), 1.85 (H-13 $\alpha$ ), 1.58 (H-20)                                              | 2.11 (H-10 $\beta$ ), 2.03 (H-10 $\alpha$ ), 1.58 (H-20)                       |
| 15        | 19.8                | C                              | -                   | -                           | 2.17 (H-13 $\beta$ ), 2.03 (H-10 $\alpha$ ), 1.85 (H-13 $\alpha$ ), 1.74 (H-14 $\alpha$ ), 1.58 (H-20), 0.95 (H-14 $\beta$ ) | -                                                                              |
| 16        | 28.9                | CH <sub>3</sub>                | 2.17                | ddd, $J = 14, 7, 7$ Hz      | 1.74 (H-14 $\alpha$ ), 1.58 (H-20), 0.95 (H-14 $\beta$ ), 0.58 (H-1)                                                         | 1.85 (H-13 $\alpha$ ), 1.74 (H-14 $\alpha$ ), 0.95 (H-14 $\beta$ )             |
| 17        | 15.8                | CH <sub>3</sub>                | 1.85                | ddd, $J = 14, 8, 6$ Hz      | 1.74 (H-14 $\alpha$ ), 1.58 (H-20), 0.95 (H-14 $\beta$ )                                                                     | 2.17 (H-13 $\beta$ ), 1.74 (H-14 $\alpha$ ), 0.95 (H-14 $\beta$ )              |
| 18        | 16.2                | CH <sub>3</sub>                | 1.74                | ddd, $J = 14, 7, 6, 2$ Hz m | 1.85 (H-13 $\alpha$ ), 1.23 (H-2)                                                                                            | 2.17 (H-13 $\beta$ ), 1.85 (H-13 $\alpha$ ), 0.95 (H-14 $\beta$ ), 0.58 (H-1)  |
| 19        | 15.7                | CH <sub>3</sub>                | 0.95                | -                           | 1.74 (H-14 $\alpha$ ), 1.23 (H-2), 1.05 (H-16), 0.94 (H-17), 0.58 (H-1)                                                      | 2.17 (H-13 $\beta$ ), 1.85 (H-13 $\alpha$ ), 1.74 (H-14 $\alpha$ ), 0.58 (H-1) |
| 20        | 16.5                | CH <sub>3</sub>                | -                   | -                           | 1.23 (H-2), 0.94 (H-17), 0.58 (H-1)                                                                                          | -                                                                              |
|           |                     |                                |                     |                             | 1.23 (H-2), 1.05 (H-16)                                                                                                      | -                                                                              |
|           |                     |                                |                     |                             | 4.87 (H-3), 2.11 (H-5 $\beta$ )                                                                                              | 4.87 (H-3)                                                                     |
|           |                     |                                |                     |                             | 4.89 (H-6), 1.89 (H-9 $\beta$ )                                                                                              | 4.89 (H-7)                                                                     |
|           |                     |                                |                     |                             | 4.97 (H-11), 1.85 (H-13 $\alpha$ )                                                                                           | 4.97 (H-11)                                                                    |

## Supplemental Table 6 footnotes:

† Numbering is based on Tan *et al.* (2009), which is shown directly above the table.

\*Obscured by water peak

Supplemental Table 7: NMR analysis of 5 $\alpha$ -hydroxy-casbene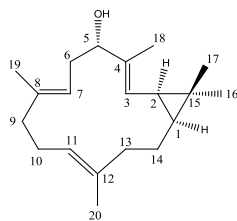

| Position† | $\delta_C$<br>(ppm) | Multiplicity in<br>edited-HSQC | $\delta_H$<br>(ppm) | Multiplicity in $^1H$ NMR       | Correlations from $^{13}C$ to $^1H$ observed in HMBC<br>(via $^2J_{CH}$ or $^3J_{CH}$ ) | Correlations from $^1H$ to $^1H$ observed in COSY<br>(principally $^3J_{HH}$ ) |
|-----------|---------------------|--------------------------------|---------------------|---------------------------------|-----------------------------------------------------------------------------------------|--------------------------------------------------------------------------------|
| 1         | 31.5                | CH                             | 0.64                | <i>dd</i> , $J = 10, 10$ Hz     | 1.07 (H-16), 0.96 (H-17)                                                                | 1.26 (H-2), 0.95 (H-14 $\beta$ )                                               |
| 2         | 25.5                | CH                             | 1.26                | <i>M</i>                        | 1.07 (H-16), 0.96 (H-17)                                                                | 5.11 (H-3), 0.64 (H-1)                                                         |
| 3         | 125.9*              | CH                             | 5.11                | <i>d</i> , $J = 9$ Hz           | 1.69 (H-18)                                                                             | 1.69 (H-18), 1.26 (H-2)                                                        |
| 4         | 137.4*              | C                              | -                   | -                               | 1.69 (H-18)                                                                             | -                                                                              |
| 5         | 79.4                | CH                             | 4.08                | <i>br d</i> , $J = 12$ Hz       | 1.69 (H-18)                                                                             | 2.42 (H-6 $\alpha$ ), 2.31 (H-6 $\beta$ ), 1.42 (5-OH)                         |
| 6         | 33.1                | CH <sub>2</sub>                | 2.42                | <i>ddd</i> , $J = 14, 12, 7$ Hz | -                                                                                       | 4.78 (H-7), 4.08 (H-5), 2.31 (H-6 $\beta$ )                                    |
|           |                     |                                | 2.31                | <i>ddd</i> , $J = 14, 6, 4$ Hz  |                                                                                         | 4.78 (H-7), 4.08 (H-5), 2.42 (H-6 $\alpha$ )                                   |
| 7         | 120.5               | CH                             | 4.78                | <i>dd</i> , $J = 7, 6$ Hz       | 1.61 (H-19)                                                                             | 2.42 (H-6 $\alpha$ ), 2.31 (H-6 $\beta$ ), 1.61 (H-19)                         |
| 8         | 135.3*              | C                              | -                   | -                               | 1.61 (H-19)                                                                             | -                                                                              |
| 9         | 39.3                | CH <sub>2</sub>                | 2.13                | <i>m</i>                        | 1.61 (H-19)                                                                             | 1.88 (H-9 $\beta$ )                                                            |
|           |                     |                                | 1.88                | <i>m</i>                        |                                                                                         | 2.13 (H-9 $\alpha$ )                                                           |
| 10        | 24.0                | CH <sub>2</sub>                | 2.11                | <i>m</i>                        | -                                                                                       | 4.94 (H-11), 2.11 (H-10 $\beta$ )                                              |
|           |                     |                                | 2.06                | <i>m</i>                        |                                                                                         | 4.94 (H-11), 2.06 (H-10 $\alpha$ )                                             |
| 11        | 123.4               | CH                             | 4.94                | <i>dd</i> , $J = 7, 6$ Hz       | 1.59 (H-20)                                                                             | 2.11 (H-10 $\beta$ ), 2.06 (H-10 $\alpha$ ), 1.59 (H-20)                       |
| 12        | 135.5*              | C                              | -                   | -                               | 1.59 (H-20)                                                                             | -                                                                              |
| 13        | 40.4                | CH <sub>2</sub>                | 2.21                | <i>ddd</i> , $J = 14, 7, 7$ Hz  | 1.59 (H-20)                                                                             | 1.89 (H-13 $\alpha$ ), 1.73 (H-14 $\alpha$ ), 0.95 (H-14 $\beta$ )             |
|           |                     |                                | 1.89                | <i>m</i>                        |                                                                                         | 2.21 (H-13 $\beta$ ), 1.73 (H-14 $\alpha$ ), 0.95 (H-14 $\beta$ )              |
| 14        | 23.6                | CH <sub>2</sub>                | 1.73                | <i>ddd</i> , $J = 14, 7, 7$ Hz  | -                                                                                       | 2.21 (H-13 $\alpha$ ), 1.89 (H-13 $\beta$ ), 0.95 (H-14 $\beta$ )              |
|           |                     |                                | 0.95                | <i>m</i>                        |                                                                                         | 2.21 (H-13 $\alpha$ ), 1.89 (H-13 $\beta$ ), 1.73 (H-14 $\alpha$ ), 0.64 (H-1) |
| 15        | 20.7*               | C                              | -                   | -                               | 1.07 (H-16), 0.96 (H-17)                                                                | -                                                                              |
| 16        | 28.8                | CH <sub>3</sub>                | 1.07                | [3H] <i>s</i>                   | 0.96 (H-17)                                                                             | -                                                                              |
| 17        | 15.8                | CH <sub>3</sub>                | 0.96                | [3H] <i>s</i>                   | 1.07 (H-16)                                                                             | -                                                                              |
| 18        | 10.4                | CH <sub>3</sub>                | 1.69                | [3H] <i>s</i>                   | -                                                                                       | 5.11 (H-3)                                                                     |
| 19        | 16.2*               | CH <sub>3</sub>                | 1.61                | [3H] <i>s</i>                   | -                                                                                       | 4.78 (H-7)                                                                     |
| 20        | 16.8                | CH <sub>3</sub>                | 1.59                | [3H] <i>s</i>                   | -                                                                                       | 4.94 (H-11)                                                                    |

## Supplemental Table 7 footnotes:

† Numbering is based on Tan *et al.* (2009).\*Signal to noise ratio too low for detection in 1D- $^{13}C$  NMR, but observed indirectly in HSQC and/or HMBC



## Supplemental Table 8: NMR analysis of 5-keto-casbene

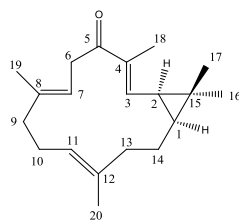

| Position† | $\delta_C$<br>(ppm) | Multiplicity in<br>edited-HSQC | $\delta_H$<br>(ppm)  | Multiplicity in $^1H$ NMR                                          | Correlations from $^{13}C$ to $^1H$ observed in HMBC<br>(via $^2J_{CH}$ or $^3J_{CH}$ ) | Correlations from $^1H$ to $^1H$ observed in<br>COSY (principally $^3J_{HH}$ ) |
|-----------|---------------------|--------------------------------|----------------------|--------------------------------------------------------------------|-----------------------------------------------------------------------------------------|--------------------------------------------------------------------------------|
| 1         | 27.6                | CH                             | 0.83                 | <i>M</i>                                                           | 1.16 (H-16), 1.10 (H-17)                                                                | -                                                                              |
| 2         | 35.4                | **                             | 1.48                 | <i>M</i>                                                           | 1.16 (H-16), 1.10 (H-17)                                                                | 6.39 (H-3)                                                                     |
| 3         | 143.3               | CH                             | 6.39                 | <i>d</i> , <i>J</i> = 10 Hz                                        | 1.87 (H-18)                                                                             | 1.87 (H-18), 1.48 (H-2)                                                        |
| 4         | 136.8               | C                              | -                    | -                                                                  | 1.87 (H-18)                                                                             | -                                                                              |
| 5         | 200.1               | C                              | -                    | -                                                                  | 1.87 (H-18)                                                                             | -                                                                              |
| 6         | 39.5                | CH <sub>2</sub>                | 3.55<br>2.99         | <i>dd</i> , <i>J</i> = 14, 9 Hz<br><i>dd</i> , <i>J</i> = 14, 6 Hz | -                                                                                       | 5.08 (H-7), 2.99 (H-6)<br>5.08 (H-7), 3.55 (H-6)                               |
| 7         | 119.4               | CH                             | 5.08                 | <i>dd</i> , <i>J</i> = 9, 6 Hz                                     | 1.57 (H-19)                                                                             | 3.55 (H-6), 2.99 (H-6), 1.57 (H-19)                                            |
| 8         | 137.2               | C                              | -                    | -                                                                  | 1.57 (H-19)                                                                             | -                                                                              |
| 9         | 39.3                | CH <sub>2</sub>                | 2.10<br>2.00         | <i>m</i><br><i>m</i>                                               | 1.57 (H-19)                                                                             | 2.00 (H-9)<br>2.10 (H-9)                                                       |
| 10        | 24.1                | CH <sub>2</sub>                | 2.16<br>1.97         | <i>m</i><br><i>m</i>                                               | -                                                                                       | 4.84 (H-11), 1.97 (H-10)<br>4.84 (H-11), 2.16 (H-10)                           |
| 11        | 124.4               | CH                             | 4.84                 | <i>dd</i> , <i>J</i> = 7, 6 Hz                                     | 1.56 (H-20)                                                                             | 2.16 (H-10), 1.97 (H-10), 1.56 (H-20)                                          |
| 12        | 136.3               | C                              | -                    | -                                                                  | 1.56 (H-20)                                                                             | -                                                                              |
| 13        | 40.1                | CH <sub>2</sub>                | 2.19<br>1.75<br>0.87 | <i>m</i><br><i>m</i><br><i>m</i>                                   | 1.56 (H-20)                                                                             | 1.75 (H-13), 0.87 (H-14)<br>2.19 (H-13)                                        |
| 14        | **                  | **                             | 2.07<br>0.87         | <i>m</i><br><i>m</i>                                               | -                                                                                       | 1.75 (H-13), 0.87 (H-14)<br>2.07 (H-14)                                        |
| 15        | 25.6                | C                              | -                    | -                                                                  | 1.16 (H-17), 1.10 (H-16)                                                                | -                                                                              |
| 16        | 29.1                | CH <sub>3</sub>                | 1.16                 | [3H] <i>s</i>                                                      | 1.10 (H-17)                                                                             | -                                                                              |
| 17        | 16.0                | CH <sub>3</sub>                | 1.10                 | [3H] <i>s</i>                                                      | 1.16 (H-16)                                                                             | -                                                                              |
| 18        | 11.8                | CH <sub>3</sub>                | 1.87                 | [3H] <i>s</i>                                                      | -                                                                                       | 6.39 (H-3)                                                                     |
| 19        | 15.6                | CH <sub>3</sub>                | 1.57                 | [3H] <i>s</i> +                                                    | -                                                                                       | 5.08 (H-6)                                                                     |
| 20        | 15.4                | CH <sub>3</sub>                | 1.56                 | [3H] <i>s</i> +                                                    | -                                                                                       | 4.84 (H-11)                                                                    |

## Supplemental Table 8 footnotes:

† Numbering is based on Tan *et al.* (2009).\*Signal to noise ratio too low for detection in 1D- $^{13}C$  NMR, but observed indirectly in HSQC and/or HMBC\*\* Not detected in either  $^{13}C$  NMR or HSQC

+ Obscured by water peak

## Supplemental Table 9: NMR analysis of 5-keto-7,8-epoxy-casbene

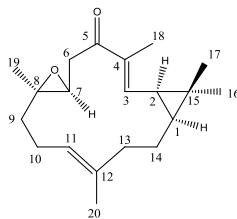

| Position† | $\delta_C$<br>(ppm) | Multiplicity in<br>edited-HSQC | $\delta_H$<br>(ppm)                           | Multiplicity in $^1H$ NMR                                                       | Correlations from $^{13}C$ to $^1H$ observed in HMBC<br>(via $^2J_{CH}$ or $^3J_{CH}$ )     | Correlations from $^1H$ to $^1H$ observed in<br>COSY (principally $^3J_{HH}$ )                                                          |
|-----------|---------------------|--------------------------------|-----------------------------------------------|---------------------------------------------------------------------------------|---------------------------------------------------------------------------------------------|-----------------------------------------------------------------------------------------------------------------------------------------|
| 1         | 35.4                | CH                             | 1.22                                          | <i>M</i>                                                                        | 1.66 (H-13 $\alpha$ ), 1.22 (H-17), 1.17 (H-16), 0.62 (H-14 $\beta$ )                       | 1.52 (H-2), 0.62 (H-14 $\beta$ )                                                                                                        |
| 2         | 27.1                | CH                             | 1.52                                          | <i>M</i>                                                                        | 1.22 (H-17), 1.17 (H-16)                                                                    | 6.58 (H-3), 1.22 (H-1)                                                                                                                  |
| 3         | 144.5               | CH                             | 6.58                                          | <i>d</i> , <i>J</i> = 9 Hz                                                      | 1.94 (H-18)                                                                                 | 1.94 (H-18), 1.52 (H-2)                                                                                                                 |
| 4         | 139.3               | C                              | -                                             | -                                                                               | 2.28 (H-6 $\alpha$ ), 1.94 (H-18)                                                           | -                                                                                                                                       |
| 5         | 196.9               | C                              | -                                             | -                                                                               | 6.58 (H-3), 3.63 (H-6 $\beta$ ), 2.28 (H-6 $\alpha$ ), 1.94 (H-18)                          | -                                                                                                                                       |
| 6         | 40.8                | CH <sub>2</sub>                | 3.63<br>2.28<br>(H $\beta$ )<br>(H $\alpha$ ) | <i>dd</i> , <i>J</i> = 12, 5 Hz<br><i>dd</i> , <i>J</i> = 12, 9 Hz              | 3.02 (H-7)                                                                                  | 3.02 (H-7), 2.28 (H-6 $\alpha$ )<br>3.63 (H $\beta$ ), 3.02 (H-7)                                                                       |
| 7         | 60.6                | CH                             | 3.02                                          | <i>dd</i> , <i>J</i> = 9, 5 Hz                                                  | 2.28 (H-6 $\alpha$ ), 2.09 (H-9 $\alpha$ ), 0.96 (H-9 $\beta$ ), 1.41 (H-19)                | 3.63 (H-6 $\beta$ ), 2.28 (H-6 $\alpha$ )                                                                                               |
| 8         | 61.0                | C                              | -                                             | -                                                                               | 3.63 (H-6 $\beta$ ), 2.21 (H-10 $\beta$ ), 1.41 (H-19)                                      | -                                                                                                                                       |
| 9         | 40.2                | CH <sub>2</sub>                | 2.09<br>(H $\alpha$ )<br>0.96<br>(H $\beta$ ) | <i>m</i><br><i>ddd</i> , <i>J</i> = 13, 13, 4 Hz                                | 2.21 (H-10 $\beta$ ), 1.80 (H-10 $\alpha$ ), 1.41 (H-19)                                    | 2.21 (H-10 $\beta$ ), 0.96 (H-9 $\beta$ )<br>2.21 (H-10 $\beta$ ), 2.09 (H-9 $\alpha$ ), 1.80 (H-10 $\alpha$ )                          |
| 10        | 23.1                | CH <sub>2</sub>                | 2.21<br>(H $\beta$ )<br>1.80<br>(H $\alpha$ ) | <i>ddd</i> , <i>J</i> = 14, 10, 4, 4 Hz<br><i>ddd</i> , <i>J</i> = 14, 13, 6 Hz | 4.84 (H-11), 2.09 (H-9 $\alpha$ ), 0.96 (H-9 $\beta$ )                                      | 4.84 (H-11), 2.09 (H-9 $\alpha$ ), 1.80 (H-10 $\alpha$ ), 0.96 (H-9 $\beta$ )<br>4.84 (H-11), 2.21 (H-10 $\beta$ ), 0.96 (H-9 $\beta$ ) |
| 11        | 123.3               | CH                             | 4.84                                          | <i>dd</i> , <i>J</i> = 10, 6 Hz                                                 | 2.21 (H-10 $\beta$ ), 2.09 (H-13 $\beta$ ), 1.66 (H-13 $\alpha$ ), 1.51 (H-20)              | 2.21 (H-10 $\beta$ ), 1.80 (H-10 $\alpha$ ), 1.51 (H-20)                                                                                |
| 12        | 137.4               | C                              | -                                             | -                                                                               | 2.21 (H-10), 2.09 (H-13 $\beta$ ), 1.66 (H-13 $\alpha$ ), 1.51 (H-20), 0.62 (H-14 $\beta$ ) | -                                                                                                                                       |
| 13        | 39.7                | CH <sub>2</sub>                | 2.09<br>(H $\beta$ )<br>1.66<br>(H $\alpha$ ) | <i>m</i><br><i>dd</i> , <i>J</i> = 12, 12 Hz                                    | 4.84 (H-11), 2.04 (H-14 $\alpha$ ), 1.51 (H-20), 0.62 (H-14 $\beta$ )                       | 1.66 (H-13 $\alpha$ ), 0.62 (H-14 $\beta$ )<br>2.09 (H-13 $\beta$ ), 2.04 (H-14 $\alpha$ ), 0.62 (H-14 $\beta$ )                        |
| 14        | 26.9                | CH <sub>2</sub>                | 2.04<br>(H $\alpha$ )<br>0.62<br>(H $\beta$ ) | <i>m</i><br><i>ddd</i> , <i>J</i> = 12, 12, 12 Hz                               | 2.09 (H-13 $\beta$ ), 1.66 (H-13 $\alpha$ )                                                 | 1.66 (H-13 $\alpha$ ), 0.62 (H-14 $\beta$ )<br>2.09 (H-13 $\beta$ ), 2.04 (H-14 $\alpha$ ), 1.66 (H-13 $\alpha$ ),<br>1.22 (H-1)        |
| 15        | 24.1                | C                              | -                                             | -                                                                               | 6.58 (H-3), 1.22 (H-17), 1.17 (H-16)                                                        | -                                                                                                                                       |
| 16        | 28.5                | CH <sub>3</sub>                | 1.17                                          | [3H] <i>s</i>                                                                   | 1.52 (H-2), 1.22 (H-17)                                                                     | -                                                                                                                                       |
| 17        | 15.5                | CH <sub>3</sub>                | 1.22                                          | [3H] <i>s</i>                                                                   | 1.17 (H-16)                                                                                 | -                                                                                                                                       |
| 18        | 11.8                | CH <sub>3</sub>                | 1.94                                          | [3H] <i>s</i>                                                                   | 6.58 (H-3)                                                                                  | 6.58 (H-3)                                                                                                                              |
| 19        | 16.4                | CH <sub>3</sub>                | 1.41                                          | [3H] <i>s</i>                                                                   | 2.09 (H-9 $\alpha$ ), 0.96 (H-9 $\beta$ )                                                   | -                                                                                                                                       |
| 20        | 14.4                | CH <sub>3</sub>                | 1.51                                          | [3H] <i>s</i>                                                                   | 4.84 (H-11), 1.66 (H-13 $\alpha$ )                                                          | 4.84 (H-11)                                                                                                                             |

## Supplemental Table 9 footnotes:

† Numbering is based on Tan *et al.* (2009).

## Supplemental Table 10: NMR analysis of neocembrene

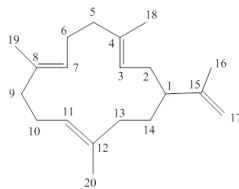

| Position† | $\delta_C$<br>(ppm) | Multiplicity in<br>edited-HSQC | $\delta_H$<br>(ppm)                                                    | Multiplicity in $^1H$ NMR                                                            | Correlations from $^{13}C$ to $^1H$ observed in HMBC<br>(via $^2J_{CH}$ or $^3J_{CH}$ )                                 | Correlations from $^1H$ to $^1H$ observed in<br>COSY (principally $^3J_{HH}$ )                                                |
|-----------|---------------------|--------------------------------|------------------------------------------------------------------------|--------------------------------------------------------------------------------------|-------------------------------------------------------------------------------------------------------------------------|-------------------------------------------------------------------------------------------------------------------------------|
| 1         | 46.0                | CH                             | 2.03                                                                   | <i>M</i>                                                                             | 4.71 (H-17), 4.65 (H-17), 1.99 (H-2), 1.95 (H-2), 1.75 (H-13 $\alpha$ ),<br>1.67 (H-14 $\beta$ ), 1.37 (H-14 $\alpha$ ) | 4.65 (H-17), 1.37 (H-14 $\alpha$ )                                                                                            |
| 2         | 32.4                | CH <sub>2</sub>                | 1.99<br>1.95                                                           | <i>m</i><br><i>m</i>                                                                 | 5.19 (H-3), 2.03 (H-1), 1.67 (H-14 $\beta$ ), 1.37 (H-14 $\alpha$ )                                                     | 5.19 (H-3)<br>5.19 (H-3)                                                                                                      |
| 3         | 124.0               | CH                             | 5.19                                                                   | <i>dd</i> , <i>J</i> = 7, 7 Hz                                                       | 2.17 (H-5), 1.99 (H-2), 1.95 (H-5), 1.57 (H-18)                                                                         | 1.99 (H-2), 1.95 (H-2), 1.57 (H-18)                                                                                           |
| 4         | 134.8               | C                              | -                                                                      | -                                                                                    | 1.99 (H-2), 1.95 (H-2), 1.57 (H-18)                                                                                     | -                                                                                                                             |
| 5         | 39.0                | CH <sub>2</sub>                | 2.17<br>2.12                                                           | <i>m</i><br><i>m</i>                                                                 | 5.19 (H-3), 4.98 (H-7), 1.57 (H-18)                                                                                     | -                                                                                                                             |
| 6         | 24.9                | CH <sub>2</sub>                | 2.27<br>(H $\beta$ )<br>2.17<br>(H $\alpha$ )<br>4.98                  | <i>m</i><br><i>m</i><br><i>m</i>                                                     | 4.98 (H-7), 2.17 (H-5), 2.12 (H-5)                                                                                      | 4.98 (H-7)<br>4.98 (H-7)                                                                                                      |
| 7         | 125.9               | CH                             | 4.98                                                                   | <i>dd</i> , <i>J</i> = 6, 6 Hz                                                       | 2.07 (H-9), 2.03 (H-9), 1.59 (H-19)                                                                                     | 2.27 (H-6 $\alpha$ ), 2.17 (H-6 $\beta$ ), 1.59 (H-19)                                                                        |
| 8         | 133.4               | C                              | -                                                                      | -                                                                                    | 2.07 (H-9), 2.03 (H-9), 1.59 (H-19)                                                                                     | -                                                                                                                             |
| 9         | 39.4                | CH <sub>2</sub>                | 2.07<br>2.03                                                           | <i>m</i><br><i>m</i>                                                                 | 5.06 (H-11), 4.98 (H-7), 2.12 (H-10), 1.59 (H-19)                                                                       | -                                                                                                                             |
| 10        | 23.7                | CH <sub>2</sub>                | 2.12<br>2.12                                                           | <i>m</i><br><i>m</i>                                                                 | 5.06 (H-11), 2.07 (H-9), 2.03 (H-9)                                                                                     | 5.06 (H-11)<br>5.06 (H-11)                                                                                                    |
| 11        | 121.8               | CH                             | 5.06                                                                   | <i>dd</i> , <i>J</i> = 6, 6 Hz                                                       | 2.12 (H-10), 2.07 (H-9), 2.03 (H-9), 1.56 (H-20)                                                                        | 2.12 (H-10), 1.56 (H-20)                                                                                                      |
| 12        | 133.9               | C                              | -                                                                      | -                                                                                    | 2.12 (H-10), 1.67 (H-14 $\beta$ ), 1.56 (H-20), 1.37 (H-14 $\alpha$ )                                                   | -                                                                                                                             |
| 13        | 34.0                | CH <sub>2</sub>                | 1.95<br>(H $\beta$ )<br>1.75<br>(H $\alpha$ )<br>1.37<br>(H $\alpha$ ) | <i>m</i><br><i>ddd</i> , <i>J</i> = 13, 10, 3 Hz                                     | 5.06 (H-11), 2.03 (H-1), 1.67 (H-14 $\beta$ ), 1.56 (H-20), 1.37 (H-14 $\alpha$ )                                       | 1.75 (H-13 $\alpha$ ), 1.37 (H-14 $\alpha$ )<br>1.95 (H-13 $\beta$ ), 1.67 (H-14 $\beta$ ), 1.37 (H-14 $\alpha$ )             |
| 14        | 28.1                | CH <sub>2</sub>                | 1.67<br>(H $\beta$ )<br>1.37<br>(H $\alpha$ )                          | <i>dddd</i> , <i>J</i> = 14, 10, 4, 4 Hz<br><i>dddd</i> , <i>J</i> = 14, 10, 7, 4 Hz | 2.03 (H-1), 1.95 (H-13 $\beta$ ), 1.75 (H-13 $\alpha$ )                                                                 | 1.75 (H-13 $\alpha$ ), 1.37 (H-14 $\alpha$ )<br>2.03 (H-1), 1.95 (H-13 $\beta$ ), 1.75 (H-13 $\alpha$ ), 1.67 (H-14 $\beta$ ) |
| 15        | 149.3               | C                              | -                                                                      | -                                                                                    | 4.71 (H-17), 4.65 (H-17), 2.03 (H-1), 1.95 (H-2), 1.66 (H-16), 1.37 (H-14)                                              | -                                                                                                                             |
| 16        | 19.3                | CH <sub>3</sub>                | 1.66                                                                   | [3H] <i>s</i>                                                                        | 4.71 (H-17), 4.65 (H-17), 2.03 (H-1)                                                                                    | 4.71 (H-17), 4.65 (H-17)                                                                                                      |
| 17        | 110.1               | CH <sub>2</sub>                | 4.71<br>4.65                                                           | <i>s</i><br><i>s</i>                                                                 | 2.03 (H-1), 1.66 (H-16)                                                                                                 | 1.66 (H-16)<br>2.03 (H-1), 1.66 (H-16)                                                                                        |
| 18        | 15.5                | CH <sub>3</sub>                | 1.57                                                                   | [3H] <i>s</i>                                                                        | 5.19 (H-3), 2.17 (H-5), 2.12 (H-5)                                                                                      | 5.19 (H-3)                                                                                                                    |
| 19        | 15.3                | CH <sub>3</sub>                | 1.59                                                                   | [3H] <i>s</i>                                                                        | 4.98 (H-7), 2.07 (H-9), 2.03 (H-9)                                                                                      | 4.98 (H-7)                                                                                                                    |
| 20        | 18.0                | CH <sub>3</sub>                | 1.56                                                                   | [3H] <i>s</i>                                                                        | 5.06 (H-11), 1.75 (H-13 $\alpha$ )                                                                                      | 5.06 (H-11)                                                                                                                   |

## Supplemental Table 10 footnotes:

† Numbering is based on Tan *et al.* (2009).

## Supplemental Table 11: NMR analysis of 5-keto-neocembrene

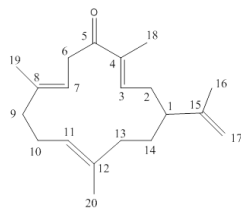

| Position† | $\delta_C$ (ppm) | Multiplicity in edited-HSQC | $\delta_H$ (ppm)                        | Multiplicity in $^1H$ NMR                                          | Correlations from $^{13}C$ to $^1H$ observed in HMBC (via $^2J_{CH}$ or $^3J_{CH}$ )                                             | Correlations from $^1H$ to $^1H$ observed in COSY (principally $^3J_{HH}$ )                            |
|-----------|------------------|-----------------------------|-----------------------------------------|--------------------------------------------------------------------|----------------------------------------------------------------------------------------------------------------------------------|--------------------------------------------------------------------------------------------------------|
| 1         | 44.8             | CH                          | 2.16                                    | <i>M</i>                                                           | 6.53 (H-3), 4.79 (H-17), 4.72 (H-17), 2.30 (H-2 $\beta$ ), 2.16 (H-2 $\alpha$ ), 1.76 (H-13 $\alpha$ ), 1.69 (H-16), 1.44 (H-14) | 1.44 (H-14)                                                                                            |
| 2         | 34.7             | CH <sub>2</sub>             | 2.30 (H $\beta$ )<br>2.16 (H $\alpha$ ) | <i>ddd</i> , <i>J</i> = 15, 11, 11 Hz<br><i>m</i>                  | 6.53 (H-3), 1.44 (H-14)                                                                                                          | 6.53 (H-3)<br>6.53 (H-3)                                                                               |
| 3         | 144.8            | CH                          | 6.53                                    | <i>dd</i> , <i>J</i> = 10, 5 Hz                                    | 2.30 (H-2 $\beta$ ), 2.16 (H-2 $\alpha$ ), 1.76 (H-18)                                                                           | 2.30 (H-2 $\beta$ ), 2.16 (H-2 $\alpha$ ), 1.76 (H-18)                                                 |
| 4         | 136.5            | C                           | -                                       | -                                                                  | 3.74 (H-6 $\beta$ ), 2.30 (H-2 $\beta$ ), 2.16 (H-2 $\alpha$ ), 1.76 (H-18)                                                      | -                                                                                                      |
| 5         | 201.7            | C                           | -                                       | -                                                                  | 6.53 (H-3), 3.74 (H-6 $\beta$ ), 1.76 (H-18)                                                                                     | -                                                                                                      |
| 6         | 40.4             | CH <sub>2</sub>             | 2.99 (H $\alpha$ )<br>3.74 (H $\beta$ ) | <i>br d</i> , <i>J</i> = 14 Hz<br><i>dd</i> , <i>J</i> = 14, 10 Hz | 5.21 (H-7)                                                                                                                       | 5.21 (H-7), 3.74 (H-6 $\beta$ ), 2.20 (H-9 $\alpha$ ), 1.66 (H-19)<br>5.21 (H-7), 2.99 (H-6 $\alpha$ ) |
| 7         | 120.5            | CH                          | 5.21                                    | <i>br d</i> , <i>J</i> = 10 Hz                                     | 3.74 (H-6 $\beta$ ), 2.07 (H-9 $\beta$ ), 1.66 (H-19)                                                                            | 3.74 (H-6 $\beta$ ), 2.99 (H-6 $\alpha$ ), 1.66 (H-19)                                                 |
| 8         | 136.2            | C                           | -                                       | -                                                                  | 2.07 (H-9 $\beta$ ), 1.66 (H-19)                                                                                                 | -                                                                                                      |
| 9         | 38.7             | CH <sub>2</sub>             | 2.20 (H $\alpha$ )<br>2.07 (H $\beta$ ) | <i>m</i><br><i>ddd</i> , <i>J</i> = 13, 11, 3 Hz                   | 4.95 (H-11), 1.66 (H-19)                                                                                                         | 2.99 (H-6 $\alpha$ )                                                                                   |
| 10        | 23.9             | CH <sub>2</sub>             | 2.16 (H $\alpha$ )<br>2.25 (H $\beta$ ) | <i>m</i><br><i>m</i>                                               | 2.07 (H-9 $\beta$ )                                                                                                              | 4.95 (H-11)<br>4.95 (H-11)                                                                             |
| 11        | 121.7            | CH                          | 4.95                                    | <i>dd</i> , <i>J</i> = 6, 6 Hz                                     | 1.59 (H-20)                                                                                                                      | 2.25 (H-10 $\beta$ ), 2.16 (H-10 $\alpha$ ), 1.59 (H-20)                                               |
| 12        | 134.3            | C                           | -                                       | -                                                                  | 1.59 (H-20), 1.44 (H-14)                                                                                                         | -                                                                                                      |
| 13        | 33.3             | CH <sub>2</sub>             | 2.00 (H $\beta$ )<br>1.76 (H $\alpha$ ) | <i>d</i> , <i>J</i> = 16 Hz<br><i>m</i>                            | 4.95 (H-11), 1.59 (H-20), 1.44 (H-14)                                                                                            | 1.76 (H-13 $\alpha$ ), 1.44 (H-14)<br>2.00 (H-13 $\beta$ ), 1.44 (H-14)                                |
| 14        | 28.8             | CH <sub>2</sub>             | 1.44<br>1.44                            | <i>m</i><br><i>m</i>                                               | 2.30 (H-2 $\beta$ ), 2.16 (H-2 $\alpha$ ), 1.76 (H-13 $\alpha$ )                                                                 | 2.16 (H-1), 2.00 (H-13 $\beta$ ), 1.76 (H-13 $\alpha$ )                                                |
| 15        | 147.9            | C                           | -                                       | -                                                                  | 4.79 (H-17), 4.72 (H-17), 1.69 (H-16), 1.44 (H-14)                                                                               | -                                                                                                      |
| 16        | 19.0             | CH <sub>3</sub>             | 1.69                                    | [3H] <i>s</i>                                                      | 4.79 (H-17), 4.72 (H-17), 2.16 (H-1)                                                                                             | 4.79 (H-17), 4.72 (H-17)                                                                               |
| 17        | 111.5            | CH <sub>2</sub>             | 4.79<br>4.72                            | <i>s</i><br><i>s</i>                                               | 1.69 (H-16)                                                                                                                      | 1.69 (H-16)<br>1.69 (H-16)                                                                             |
| 18        | 11.5             | CH <sub>3</sub>             | 1.76                                    | [3H] <i>s</i>                                                      | 6.53 (H-3)                                                                                                                       | 6.53 (H-3)                                                                                             |
| 19        | 15.2             | CH <sub>3</sub>             | 1.66                                    | [3H] <i>s</i>                                                      | 2.07 (H-9 $\beta$ )                                                                                                              | 5.21 (H-7), 5.21 (H-7)                                                                                 |
| 20        | 18.8             | CH <sub>3</sub>             | 1.59                                    | [3H] <i>s</i>                                                      | 4.95 (H-11)                                                                                                                      | 4.95 (H-11)                                                                                            |

## Supplemental Table 11 footnotes:

† Numbering is based on Tan *et al.* (2009).

## Supplemental Methods

### Structural analysis of casbene and the two casbene oxidation products via $^1\text{H}$ and $^{13}\text{C}$ NMR.

All NMR spectra were acquired using a Bruker AVIII 700 MHz instrument, equipped with a TCI cryogenically-cooled probe, operating at ambient temperature (298 K). Samples were dissolved in  $\text{CDCl}_3$  (0.5 ml), incorporating 0.03% (v/v) tetramethylsilane (TMS) as the spectral reference, then transferred to a 5 mm NMR tube.

The  $^1\text{H}$  NMR spectra of all three samples were recorded using 32 repetitions of the pulse sequence “zg30” (2 dummy scans) digitised over 131072 points, covering a sweep width of 15 ppm, resulting in an FID resolution of 0.08 Hz (total acquisition time: 6.2 s). The time data was weighted using a negative exponential function (line broadening of 0.2 Hz), followed by one-dimensional Fourier transformation to produce a spectrum containing 131072 points.

The  $^{13}\text{C}$  NMR spectra were recorded using 10240 repetitions for neocembrene and 5-keto-neocembrene, 14336 repetitions for 5-keto-7,8-epoxy-casbene, 15360 repetitions for casbene and 5-hydroxy-casbene and 22528 repetitions in the case of 5-keto-casbene, of the pulse sequence “zpgp60” (2 dummy scans) digitised over 131072 points, covering a sweep width of 270 ppm, resulting in an FID resolution of 0.36 Hz (total acquisition time: 1.4 s). The time data was weighted using a negative exponential function (line broadening of 1 Hz), followed by one-dimensional Fourier transformation to produce a spectrum containing 131072 points.

The edited-HSQC spectra were recorded using between 32-128 repetitions (32 for casbene (*ca.* 300  $\mu\text{g}$ , neocembrene (*ca.* 1 mg) 5-keto-neocembrene (*ca.* 1 mg) and 5-keto-7,8-epoxy-casbene (*ca.* 400  $\mu\text{g}$ ); 64 for 5 $\alpha$ -hydroxy-casbene (*ca.* 30  $\mu\text{g}$ ); and 128 for 5-keto-casbene (*ca.* 15  $\mu\text{g}$ )) of the pulse sequence “hsqcedetgpsisp2.2” (32 dummy scans) with 2048 points in F2 and 256 points in F1. The sweep width in F2 was 10 ppm and the sweep width in F1 was 180 ppm, resulting in a FID resolution of 3.4 Hz in F2 and 123.8 Hz in F1 (total acquisition time: 0.15 s in F2). The time data was weighted using a Qsine function (SSB=2) in both dimensions, followed by two-dimensional Fourier transformation producing a spectrum with 2048 points in F2 and 1024 points in F1.

The HMBC spectra were recorded using between 32 and 196 repetitions (32 of neocembrene, 5-keto-neocembrene and 5-keto-7,8-epoxy-casbene; 48 for casbene; 64 for 5 $\alpha$ -hydroxy-casbene; and 196 for 5-keto-casbene) of the pulse sequence “hmbcetgpl3nd” (32 dummy scans) with 4096 points in F2 and 256 points in F1. The sweep width in F2 was 10 ppm and the sweep width in F1 was 240 ppm, resulting in a FID resolution of 1.7 Hz in F2 and 165 Hz in F1 (total acquisition time: 0.29 s in F2). The time data was weighted using a Qsine function (SSB=2) in both dimensions, followed by two-

dimensional Fourier transformation and processing in magnitude mode in F2, thereby producing a spectrum with 4096 points in F2 and 1024 points in F1.

The  $^1\text{H}$ - $^1\text{H}$  COSY spectra were recorded using 4 repetitions for neocembrene and 5-keto-neocembrene, and 5-keto-7,8-epoxy-casbene, 8 repetitions for casbene and 5-hydroxy-casbene and 16 in the case of 5-keto-casbene of the pulse sequence “cosygpmfqf” (8 dummy scans) with 2048 points in F2 and 256 points in F1. The sweep width was 10 ppm in both F2 and F1, resulting in a FID resolution of 3.4 Hz in F2 and 27.4 Hz in F1 (total acquisition time: 0.15 s in F2). The time data was weighted using a sine function in both dimensions prior to Fourier transformation, producing a spectrum with 2048 points in both F2 and F1.

The NOESY spectra were recorded using 16 repetitions (32 in the case of 5-keto-casbene) of the pulse sequence “noesygpqh” (16 dummy scans) with 2048 points in F2 and 256 points in F1. The sweep width was 10 ppm in both F2 and F1, resulting in a FID resolution of 3.4 Hz in F2 and 27.4 Hz in F1 (total acquisition time: 0.15 s in F2). The mixing time for nOe build up was set at 800 ms. The time data was weighted using a Qsine function (SSB=2) in both dimensions prior to Fourier transformation, producing a spectrum with 2048 points in F2 and 1024 points in F1.

The cyclopropyl group of casbene has been depicted as 1*S*,2*R*-*cis* in Figure 4, Supplemental Figure 2 and Supplemental Table 6, in accordance with the absolute stereochemistry assigned to (-)-casbene from *Ricinus communis* by Crombie *et al.* (Crombie *et al.*, 1980). The same absolute stereochemistry has been assigned to the 5 $\alpha$ -hydroxy derivative in Figure 4, Supplemental Figure 3 and Supplemental Table 7 and the 5-keto derivative in Figure 4 and Supplemental Figure 4, on the basis that this same (-)-casbene is the biosynthetic precursor to both compounds. The configuration has been observed for the majority of casbene-derived diterpenoids (Crombie *et al.*, 1980), including those extracted from *J. curcas* (Haas *et al.*, 2002; Zhang *et al.*, 2012) and *E. peplus* (Hohmann *et al.*, 2000).

### **Cloning of casbene synthase genes from *J. curcas* and heterologous expression in *E. coli*.**

Prior to the release of the draft of the *J. curcas* genome sequence (Hirakawa *et al.*, 2012) we had cloned partial fragments of three casbene synthase genes from cDNA prepared from total RNA extracted from *J. curcas* roots via degenerate PCR, using primers detailed in Supplemental Table 3. A combination of 5'- and 3'-RACE was used to obtain full length cDNA and then genomic clones (Frohman, 1993). Long-distance PCR was used to clone the regions between the casbene synthase genes. To assay each of the casbene synthase homologues, the translated peptide sequences were first analysed using ChloroP to obtain predicted chloroplast transit peptide sequences (Emanuelsson *et al.*, 1999). The coding region without the transit peptide was then cloned into pET32b and transformed

into *E. coli* Rosetta 2 (Merck Millipore, Darmstadt, Germany). For each construct and an empty vector control, cultures were grown in 50 ml of LB medium containing 125  $\mu\text{g ml}^{-1}$  of carbenicillin inside a 250 ml flask at 37 °C with gyrotary shaking at 250 r.p.m. After reaching an OD600 of 2.0 to 2.5, IPTG was added to a final concentration of 250  $\mu\text{M}$ . The cultures were then incubated at 20 °C, 180 r.p.m. After an additional 18 hours of cultivation, the cultures were harvested by centrifugation at 4,000 g for 10 mins. The cell pellets were washed once by resuspending in 20 ml of phosphate buffered saline (PBS, pH 7.4) and centrifugation at 4,000 g for 10 mins. The cell pellets were then resuspended in 1 ml of PBS containing 1 mM dithiothreitol (DTT) and transferred to a 1.5 ml Eppendorf tube and placed in a salt-ice-water bath at approximately -10 °C. The cell pellets were then lysed with 6 cycles of 10 seconds using an ultrasonic probe, with 10 seconds pauses between cycles to allow cooling. The cell extracts were then centrifuged for 15 mins at 20,000 g to obtain a “cleared” lysate containing soluble proteins. Assays were then performed in 1.5 ml Eppendorf tubes with 340  $\mu\text{l}$  of PBS containing 1 mM DTT, 100  $\mu\text{l}$  of cleared lysate, 50  $\mu\text{l}$  of 50 mM  $\text{MgCl}_2$  and 10  $\mu\text{l}$  of 1  $\text{mg ml}^{-1}$  geranylgeranylpyrophosphate (GGPP) in 7:3 methanol: $\text{NH}_4\text{OH}$  (Sigma-Aldrich). The reactions were incubated for 3 hours at 30 °C, after which 500  $\mu\text{l}$  of hexane was added and the tubes were vortexed. After centrifugation at 12,000 g for 2 minutes, the hexane layer was recovered and 5  $\mu\text{l}$  of the extract was analysed by GC-MS.

### References for Supplemental Information Section

- Achenbach, H., and Benirschke, G.** (1997). Joannesialactone and other compounds from *Joannesia princeps*. *Phytochem.* **45**, 149-157.
- Aiyelaagbe, O.O., Adesogan, K., Ekundayo, O., and Gloer, J.B.** (2007). Antibacterial diterpenoids from *Jatropha podagrica* Hook. *Phytochem.* **68**, 2420-2425.
- Aljančić, I.S., Pešić, M., Milosavljević, S.M., Todorović, N.M., Jadranin, M., Miosavljević, G., Povrenović, D., Banković, J., Tanić, N., Marković, I.D., Ruždijić, S., Vajs, V.E., and Tešević, V.V.** (2011). Isolation and biological evaluation of jatropane diterpenoids from *Euphorbia dendroides*. *J Nat Prod* **74**, 1613-1620.
- Beutler, J.A., Alvarado, A.B., McCloud, T.G., and Cragg, G.M.** (1989). Distribution of phorbol ester bioactivity in the Euphorbiaceae. *Phytother Res* **3**, 188-192.
- Bourjot, M., Delang, L., Nguyen, V.H., Neyts, J., Gueritte, F., Leyssen, P., and Litaudon, M.** (2012). Prostratin and 12-O-tetradecanoylphorbol 13-acetate are potent and selective inhibitors of Chikungunya virus replication. *J Nat Prod* **75**, 2183-2187.
- Brooks, G., Evans, A.T., Markby, D.P., Harrison, M.E., Baldwin, M.A., and Evans, F.J.** (1990). An ingenane diterpene from Belizian *Mabea excelsa*. *Phytochem.* **29**, 1615-1617.
- Busch, T., Schuster, H., and Kirschning, A.** (2008). Determination of the absolute configuration of the diterpene tonantzitlolone B. *Tetrahedron Letters* **49**, 5273-5275.
- Chavez, K., Compagnone, R.S., Riina, R., Briceno, A., Gonzalez, T., Squitieri, E., Landaeta, C., Soscun, H., and Suarez, A.I.** (2013). Crotofolane diterpenoids from *Croton caracasanus*. *Natural Product Communications* **8**, 1679-1682.
- Crombie, L., Kneen, G., Pattenden, G., and Whybrow, D.** (1980). Total synthesis of the macrocyclic diterpene (-)-casbene, the putative biogenetic precursor of lathyrane, tiglane, ingenane, and related terpenoid structures. *Journal of the Chemical Society, Perkin Transactions 1*, 1711-1717.
- Emanuelsson, O., Nielsen, H., and Von Heijne, G.** (1999). ChloroP, a neural network-based method for predicting chloroplast transit peptides and their cleavage sites. *Protein Sci.* **8**, 978-984.
- Frohman, M.A.** (1993). Rapid amplification of complementary DNA ends for generation of full-length complementary DNAs: Thermal RACE. *Methods in Enzymology* **218**, 340-356.
- Ghisalberti, E.L., Jefferies, P.R., Mori, T.A., Skelton, B.W., and White, A.H.** (1985). A new class of macrocyclic diterpenes from *Bertya dimerostigma* (Euphorbiaceae). *Tetrahedron* **41**, 2517-2526.
- Haas, W., Sterk, H., and Mittelbach, M.** (2002). Novel 12-deoxy-16-hydroxyphorbol diesters isolated from the seed oil of *Jatropha curcas*. *J Nat Prod* **65**, 1434-1440.
- Hirakawa, H., Tsuchimoto, S., Sakai, H., Nakayama, S., Fujishiro, T., Kishida, Y., Kohara, M., Watanabe, A., Aizu, T., Toyoda, A., Fujiyama, A., Yamada, M., Tabata, S., Fukui, K., and Sato, S.** (2012). Upgraded genomic information of *Jatropha curcas* L. *Plant Biotechnol* **29**, 123-130.
- Hohmann, J., Evanics, F., Berta, L., and Bartok, T.** (2000). Diterpenoids from *Euphorbia peplus*. *Planta Med* **66**, 291-294.
- Johnson, H.E., Banack, S.A., and Cox, P.A.** (2008). Variability in content of the anti-AIDS drug candidate prostratin in Samoan populations of *Homalanthus nutans*. *J Nat Prod* **2008**, 2041-2044.
- Kashman, Y., Bernart, M., Tischler, M., Cardellina, J., and Boyd, M.** (1994). Koumbalones A and B, new casbane diterpenes from *Maprounea africana*. *J Nat Prod* **57**, 426-430.
- King, A., Montes, L.R., Clarke, J.C., Affleck, J., Li, Y., Witsenboer, H., van der Vossen, E., van der Linde, P., Tripathi, Y., Tavares, E., Shukla, P., Rajasekaran, T., van Loo, E.N., and Graham, I.A.** (2013). Linkage mapping in the oilseed crop *Jatropha curcas* L. reveals a locus controlling the biosynthesis of phorbol esters which cause seed toxicity. *Plant Biotechnol J* **11**, 986-996.



- Li, S.F., Zhang, Y., Huang, N., Zheng, Y.T., Di, Y.T., Li, S.L., Cheng, Y.Y., He, H.P., and Hao, X.J.** (2013). Daphnane diterpenoids from the stems of *Trigonostemon lii* and their anti-HIV-1 activity. *Phytochem.* **93**, 216-221.
- Lu, J., Li, G., Huang, J., Zhang, C., Zhang, L., Zhang, K., Li, P., Lin, R., and Wang, J.** (2014). Lathyrane-type diterpenoids from the seeds of *Euphorbia lathyris*. *Phytochem.* **104**.
- Madureira, A.M., Ferreira, M.J.U., Gyemant, N., Ugocsai, K., Ascenso, J.R., Abreu, P.M., Hohmann, J., and Molnar, J.** (2004). Rearranged jatrophone-type diterpenes from *Euphorbia* species. Evaluation of their effects on the reversal of multidrug resistance. *Planta Med* **70**, 45-49.
- Mongkolvisut, W., and Sutthivaiyakit, S.** (2007). Antimalarial and antituberculous poly-O-acetylated jatrophone diterpenoids from *Pedilanthus tithymaloides*. *J Nat Prod* **70**, 1434-1438.
- Murillo, R.M., Jakupovic, J., Rivera, J., and Castro, V.H.** (2001). Diterpenes and other constituents from *Croton draco* (Euphorbiaceae). *Revista De Biologia Tropical* **49**, 259-264.
- Pusztai, R., Ferreira, M.J.U., Duarte, N., Engi, H., and Molnar, J.** (2007). Macrocyclic lathyrane diterpenes as antitumor promoters. *Anticancer Res.* **27**, 201-205.
- Reis, M., Ferreira, R.J., Santos, M.M.M., dos Santos, D., Molnar, J., and Ferreira, M.J.U.** (2013). Enhancing macrocyclic diterpenes as multidrug-resistance reversers: structure-activity studies on jolkinol D derivatives. *J. Med. Chem.* **56**, 748-760.
- Sá, N.C., Cavalcante, T.T.A., Araújo, A.X., Santos, H.S.d., Albuquerque, M.R.J.R., Bandeira, P.N., Cunha, R.M.S.d., Cavada, B.S., and Teixeira, E.H.** (2012). Antimicrobial and antibiofilm action of casbane diterpene from *Croton nepetaefolius* against oral bacteria. *Arch Oral Biol* **57**, 550-555.
- Sakata, K., Kawaza, K., and Mitsui, T.** (1971). Studies on a piscicidal constituent of *Hura crepitans* part II. Chemical structure of huratoxin. *Agricultural and Biological Chemistry* **35**, 2113-2126.
- Satyanarayana, P., Kumar, K.A., Singh, S.K., and Rao, G.N.** (2001). A new phorbol diester from *Aleurites moluccana*. *Fitoterapia* **72**, 304-306.
- Seip, E.H., Ott, H.H., and Hecker, E.** (1983). Skin irritant and tumor promoting diterpene esters of the tiglane type from the chinese tallow tree (*Sapium sebiferum*). *Planta Med* **79**, 199-203.
- Shao, F.-G., Bu, R., Zhang, C., Chen, C.-J., Huang, J., and Wang, J.-H.** (2011). Two new casbane diterpenoids from the roots of *Euphorbia pekinensis*. *J Asian Nat Prod Res* **13**, 805-810.
- Tan, Q.-G., Cai, X.-H., Du, Z.-Z., and Luo, X.-D.** (2009). Three terpenoids and a tocopherol-related compound from *Ricinus communis*. *Helv Chim Acta* **92**, 2762-2768.
- Valente, C., Ferreira, M.J.U., Abreu, P.M., Gyemant, N., Ugocsai, K., Hohmann, J., and Molnar, J.** (2004). Pubescenes, jatrophone diterpenes, from *Euphorbia pubescens*, with multidrug resistance reversing activity on mouse lymphoma cells. *Planta Med* **70**, 81-84.
- Van Duuren, B.L., and Orris, L.** (1965). The tumor-enhancing principles of *Croton tiglium* L. *Cancer Res.* **25**, 1871-1875.
- Wurdack, K.J., Hoffmann, P., and Chase, M.W.** (2005). Molecular phylogenetic analysis of uniovulate Euphorbiaceae (Euphorbiaceae sensu stricto) using plastid RBCL and TRNL-F DNA sequences. *Am. J. Bot.* **92**, 1397-1420.
- Xie, Y.-F., Tao, Z.-M., Wang, H.-B., and Qin, G.-W.** (2010). Chemical constituents from the roots of *Vernicia fordii*. *Chinese Journal of Natural Medicines* **8**, 264-266.
- Yamaguchi, T., Toume, K., Arai, M.A., Ahmed, F., Sadhu, S.K., and Ishibashi, M.** (2012). Phorbol esters with wnt signal-augmenting effects isolated from *Excoecaria indica*. *Natural Product Communications* **7**, 475-477.
- Yamamura, S., Shizuri, Y., Kosemura, S., Ohtsuka, J., Tayama, T., Ohba, S., Ito, M., Saito, Y., and Terada, Y.** (1989). Diterpenes from *Euphorbia helioscopia*. *Phytochem.* **28**, 3421-3436.
- Zhang, X.-Q., Li, F., Zhao, Z.-G., Liu, X.-L., Tang, Y.-X., and Wang, M.-K.** (2012). Diterpenoids from the root bark of *Jatropha curcas* and their cytotoxic activities. *Phytochem Lett* **5**, 721-724.
